# Supplementary material for: Sb- and Bi-based coordination polymers with N-donor ligands with and without lone-pair effects and their photoluminescence properties
Source: Royal Society of Chemistry journal article supplement (doi:10.1039/d0dt00265h), 2020-01-01
Supplement: d0dt00265h1.pdf [file d0dt00265h1.pdf]

## **Sb- and Bi-based coordination polymers with N-donor ligands with and without lone-pair effects and their photoluminescence properties**

Jens R. Sorg,<sup>b</sup> Tilman Schneider,<sup>b</sup> Luise Wohlfarth,<sup>b</sup> Thomas C. Schäfer,<sup>a</sup> Alexander Sedykh,<sup>a</sup> and Klaus Müller-Buschbaum<sup>\*a,b,c</sup>

- 
- <sup>a.</sup> *T. C. Schäfer, A. Sedykh, Prof. Dr. K. Müller-Buschbaum  
Institute of Inorganic and Analytical Chemistry, Justus-Liebig-University Giessen,  
Heinrich-Buff-Ring 17, 35392 Giessen, Germany.  
Email: Klaus.Müller-Buschbaum@anorg.chemie.uni-giessen.de*
- <sup>b.</sup> *J. R. Sorg, T. Schneider, L. Wohlfarth, Prof. Dr. K. Müller-Buschbaum  
Institute of Inorganic Chemistry, Julius-Maximilians-University Würzburg,  
Am Hubland, 97074 Würzburg, Germany.*
- <sup>c.</sup> *Prof. Dr. K. Müller-Buschbaum  
Center for Materials Research (LAMA), Justus-Liebig-University Giessen,  
Heinrich-Buff-Ring 16, 35392 Giessen, Germany.*
-

## Crystallographic details

### Crystallographic details for 1a-c

**Table S1** Crystallographic data for 1a-c.

|                                                                                       | <b>1a</b>                                                         | <b>1b</b>                                                         | <b>1c</b>                                                        |
|---------------------------------------------------------------------------------------|-------------------------------------------------------------------|-------------------------------------------------------------------|------------------------------------------------------------------|
| Empirical formula                                                                     | C <sub>12</sub> H <sub>10</sub> Cl <sub>3</sub> N <sub>2</sub> Sb | C <sub>12</sub> H <sub>10</sub> Br <sub>3</sub> N <sub>2</sub> Sb | C <sub>12</sub> H <sub>10</sub> I <sub>3</sub> N <sub>2</sub> Sb |
| Formula weight /g·mol <sup>-1</sup>                                                   | 410.32                                                            | 543.70                                                            | 684.67                                                           |
| Crystal color and shape                                                               | colourless block                                                  | yellow block                                                      | orange plate                                                     |
| Crystal size                                                                          | 0.086 × 0.077 × 0.076                                             | 0.284 × 0.113 × 0.104                                             | 0.131 × 0.061 × 0.052                                            |
| Crystal system                                                                        | triclinic                                                         | triclinic                                                         | triclinic                                                        |
| Space group                                                                           | <i>P</i> -1                                                       | <i>P</i> -1                                                       | <i>P</i> -1                                                      |
| <i>a</i> /Å                                                                           | 885.40(18)                                                        | 907.36(16)                                                        | 888.23(7)                                                        |
| <i>b</i> /Å                                                                           | 907.38(18)                                                        | 909.94(16)                                                        | 957.02(8)                                                        |
| <i>c</i> /Å                                                                           | 944.45(19)                                                        | 988.12(17)                                                        | 1064.66(9)                                                       |
| $\alpha$ /°                                                                           | 77.42(3)                                                          | 67.632(3)                                                         | 67.951(3)                                                        |
| $\beta$ /°                                                                            | 69.22(3)                                                          | 80.450(4)                                                         | 85.800(3)                                                        |
| $\gamma$ /°                                                                           | 75.99(3)                                                          | 76.867(4)                                                         | 78.962(3)                                                        |
| <i>V</i> /Å <sup>3</sup>                                                              | 681.0(3)                                                          | 731.9(2)                                                          | 823.31(12)                                                       |
| <i>Z</i>                                                                              | 2                                                                 | 2                                                                 | 2                                                                |
| $\rho_{\text{calc}}$ /g·cm <sup>-3</sup>                                              | 2.001                                                             | 2.467                                                             | 2.762                                                            |
| <i>F</i> (000)                                                                        | 396.0                                                             | 504.0                                                             | 612.0                                                            |
| $\mu$ (MoK $\alpha$ ) /cm <sup>-1</sup>                                               | 2.595                                                             | 10.058                                                            | 7.286                                                            |
| Temperature /K                                                                        | 100                                                               | 100                                                               | 100                                                              |
| 2 $\theta$ range /°                                                                   | 4.662 - 56.71                                                     | 4.476 - 56.794                                                    | 4.128 - 50.7                                                     |
| No. of measured reflections                                                           | 10525                                                             | 31760                                                             | 6804                                                             |
| No. of independent reflections                                                        | 3406                                                              | 3661                                                              | 3011                                                             |
| <i>R</i> (int)                                                                        | 0.0751                                                            | 0.0505                                                            | 0.0357                                                           |
| <i>R</i> <sub>1</sub> ( <i>I</i> > 2 $\sigma$ ( <i>I</i> ))                           | 0.0303                                                            | 0.0173                                                            | 0.0290                                                           |
| <i>R</i> <sub>1</sub> (all data)                                                      | 0.0412                                                            | 0.0184                                                            | 0.0458                                                           |
| <i>wR</i> <sub>2</sub> (all data)                                                     | 0.0634                                                            | 0.0446                                                            | 0.0607                                                           |
| <i>S</i> (all data)                                                                   | 1.029                                                             | 1.067                                                             | 1.039                                                            |
| $\Delta\rho_{\text{max}}$ , $\Delta\rho_{\text{min}}$ /e <sup>-</sup> Å <sup>-3</sup> | 0.920 / -0.702                                                    | 1.073 / -0.435                                                    | 0.99/-0.80                                                       |

**Table S2:** Selected interatomic distances (in Å) and angles (in °) in 1a.

Symmetry operations: I: 1-x, 2-y, 1-z; II: 1+x, 1+y, +z

|                      |            |                          |           |                                       |           |
|----------------------|------------|--------------------------|-----------|---------------------------------------|-----------|
| Sb1 Cl3              | 2.9663(15) | Cl2 Sb1 Cl3              | 168.07(3) | N1 Sb1 Cl2                            | 87.15(7)  |
| Sb1 Cl2              | 2.4077(13) | Cl1 Sb1 Cl3              | 86.04(4)  | N1 Sb1 Cl3 <sup>I</sup>               | 88.46(7)  |
| Sb1 Cl1              | 2.4088(11) | Cl1 Sb1 Cl2              | 92.77(4)  | N2 <sup>II</sup> Sb1 Cl3              | 105.92(7) |
| Sb1 Cl3 <sup>I</sup> | 3.0099(13) | Cl1 Sb1 Cl3 <sup>I</sup> | 175.28(3) | N2 <sup>II</sup> Sb1 Cl2              | 85.83(7)  |
| Sb1 N1               | 2.348(3)   | Cl1 Sb1 N1               | 88.95(7)  | N2 <sup>II</sup> Sb1 Cl1              | 86.18(7)  |
| Sb1 N2 <sup>II</sup> | 2.500(3)   | Cl3 <sup>I</sup> Sb1 Cl3 | 97.44(4)  | N2 <sup>II</sup> Sb1 Cl3 <sup>I</sup> | 95.88(7)  |
|                      |            | Cl3 <sup>I</sup> Sb1 Cl2 | 83.16(4)  | N2 <sup>II</sup> Sb1 N1               | 171.24(9) |
|                      |            | N1 Sb1 Cl3               | 80.96(7)  |                                       |           |

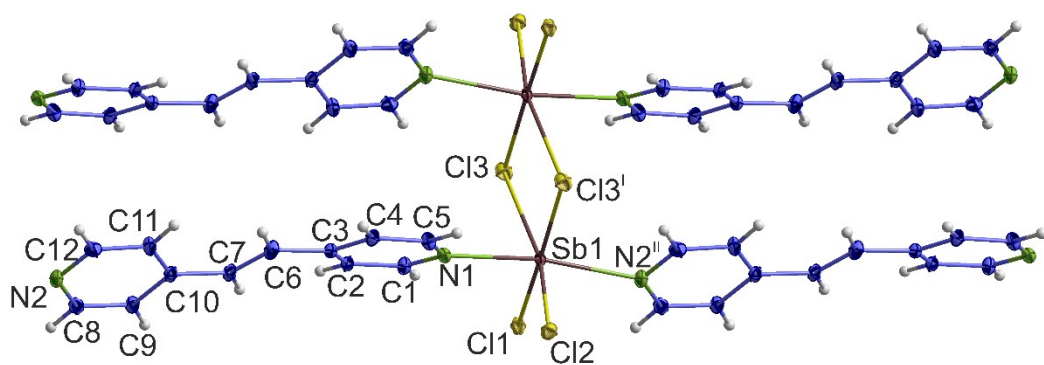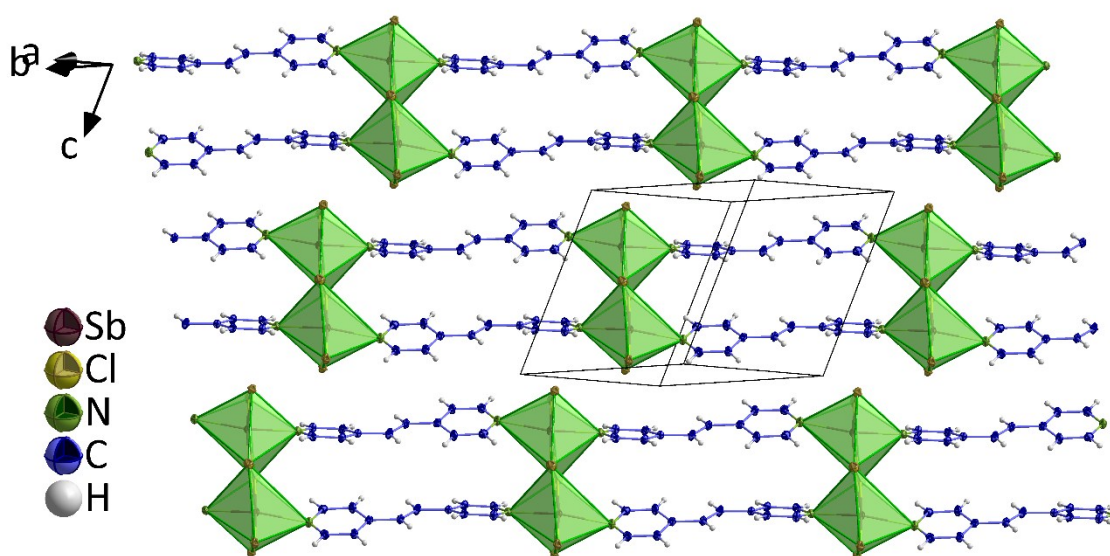

**Figure S1.** Depiction of the Sb coordination (top) and excerpt of the crystal structure displaying the linear double-strands in  $1_{\infty}$ [Sb<sub>2</sub>Cl<sub>6</sub>(bpe)<sub>2</sub>] (**1a**). Symmetry operations: I : 1-x, 2-y, 1-z; II: 1+x, 1+y, +z. Ellipsoids represent a probability level of the atoms of 50 % in this and all following figures.

**Table S3:** Selected interatomic distances (in Å) and angles (in °) in **1b**.

Symmetry operations: I: -x, 1-y, 1-z; II: 1+x, 1+y, +z

|                      |            |                          |            |                                       |           |
|----------------------|------------|--------------------------|------------|---------------------------------------|-----------|
| Sb1 Br3              | 3.0609(4)  | Br2 Sb1 Br3              | 171.287(8) | N1 Sb1 Br2                            | 88.65(4)  |
| Sb1 Br2              | 2.5849(4)  | Br1 Sb1 Br3              | 86.010(14) | N1 Sb1 Br3 <sup>I</sup>               | 88.99(4)  |
| Sb1 Br1              | 2.5701(4)  | Br1 Sb1 Br2              | 93.675(15) | N2 <sup>II</sup> Sb1 Br3              | 101.65(4) |
| Sb1 Br3 <sup>I</sup> | 3.1562(4)  | Br1 Sb1 Br3 <sup>I</sup> | 178.568(8) | N2 <sup>II</sup> Sb1 Br2              | 87.03(4)  |
| Sb1 N1               | 2.3772(17) | Br1 Sb1 N1               | 89.79(4)   | N2 <sup>II</sup> Sb1 Br1              | 87.44(4)  |
| Sb1 N2 <sup>II</sup> | 2.5299(17) | Br3 <sup>I</sup> Sb1 Br3 | 94.569(13) | N2 <sup>II</sup> Sb1 Br3 <sup>I</sup> | 93.72(4)  |
|                      |            | Br3 <sup>I</sup> Sb1 Br2 | 85.553(14) | N2 <sup>II</sup> Sb1 N1               | 174.70(6) |
|                      |            | N1 Sb1 Br3               | 82.64(4)   |                                       |           |

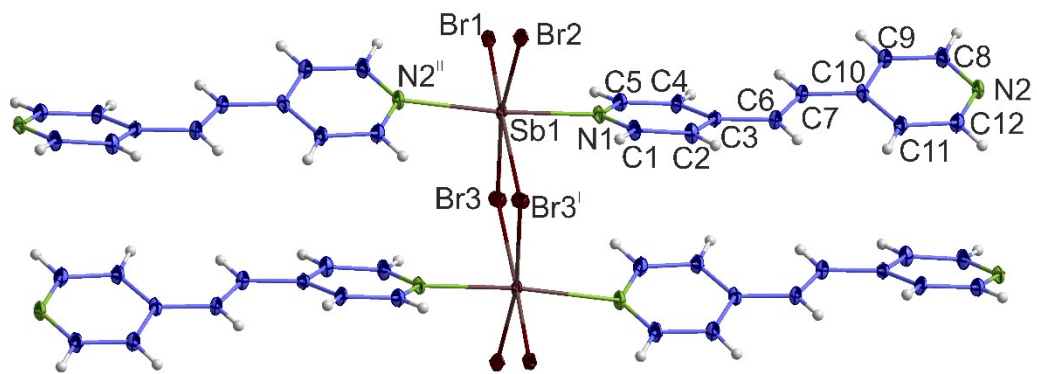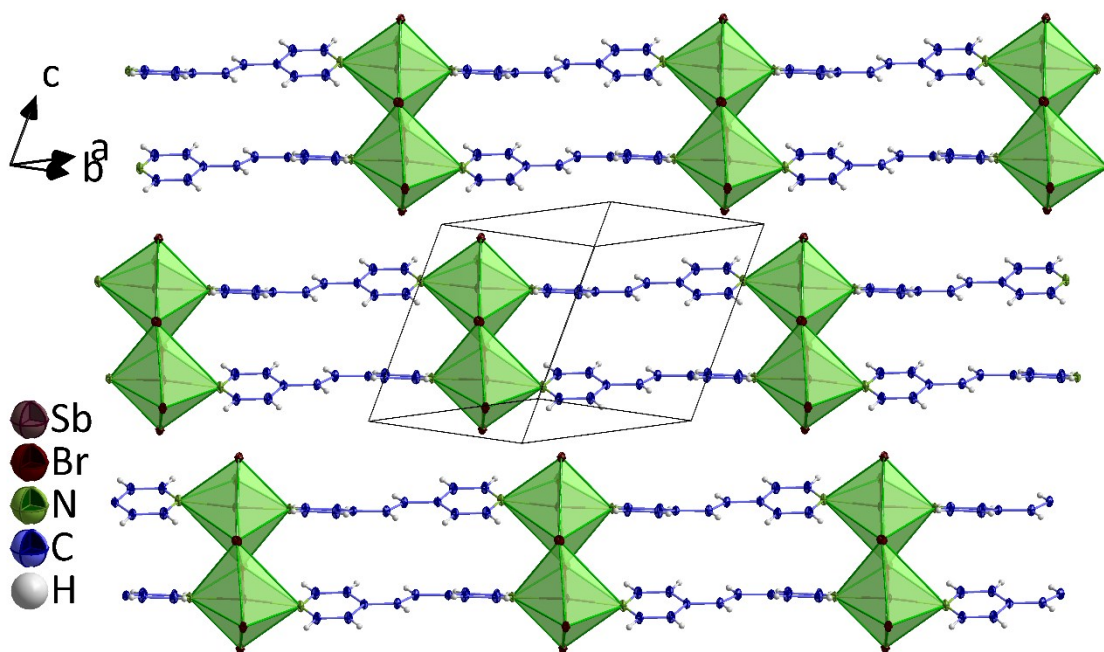

**Figure S2.** Depiction of the Sb coordination (top) and excerpt of the crystal structure displaying the linear double-strands in  $1_{\infty}[\text{Sb}_2\text{Br}_6(\text{bpe})_2]$  (**1b**). Symmetry operations: I:  $-x, 1-y, 1-z$ ; II:  $1+x, 1+y, +z$ .

**Table S4:** Selected interatomic distances (in Å) and angles (in °) in **1c**.

Symmetry operations: I: 2-x, 1-y, 1-z; II: 1+x, 1+y, +z

|                      |           |                        |             |                                      |            |
|----------------------|-----------|------------------------|-------------|--------------------------------------|------------|
| Sb1 I3               | 3.1529(6) | I2 Sb1 I3              | 175.18(2)   | N1 Sb1 I2                            | 90.27(12)  |
| Sb1 I2               | 2.8549(6) | I1 Sb1 I3              | 89.080(18)  | N1 Sb1 I3 <sup>I</sup>               | 87.66(13)  |
| Sb1 I1               | 2.7829(6) | I1 Sb1 I2              | 93.552(18)  | N2 <sup>II</sup> Sb1 I3              | 91.89(12)  |
| Sb1 I3 <sup>I</sup>  | 3.4145(6) | I1 Sb1 I3 <sup>I</sup> | 177.093(18) | N2 <sup>II</sup> Sb1 I2              | 92.24(12)  |
| Sb1 N1               | 2.384(5)  | I1 Sb1 N1              | 89.41(13)   | N2 <sup>II</sup> Sb1 I1              | 88.24(13)  |
| Sb1 N2 <sup>II</sup> | 2.517(5)  | I3 <sup>I</sup> Sb1 I3 | 90.686(16)  | N2 <sup>II</sup> Sb1 I3 <sup>I</sup> | 94.73(12)  |
|                      |           | I3 <sup>I</sup> Sb1 I2 | 86.481(16)  | N2 <sup>II</sup> Sb1 N1              | 176.66(17) |
|                      |           | N1 Sb1 I3              | 85.71(12)   |                                      |            |

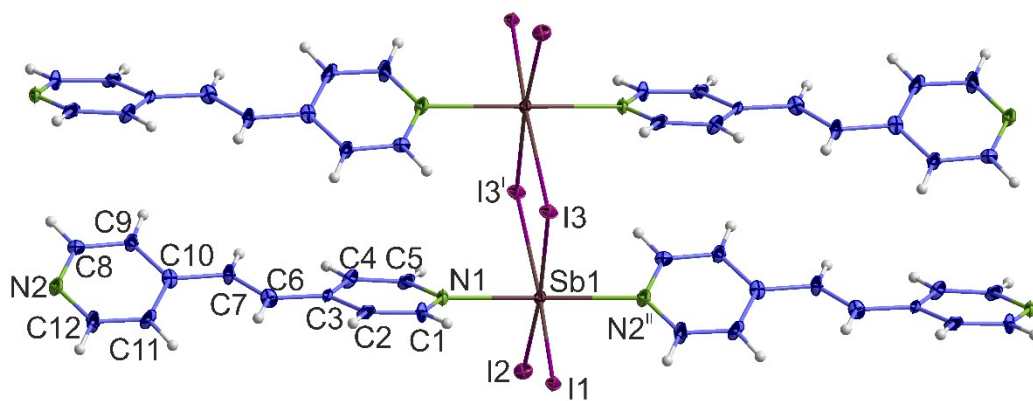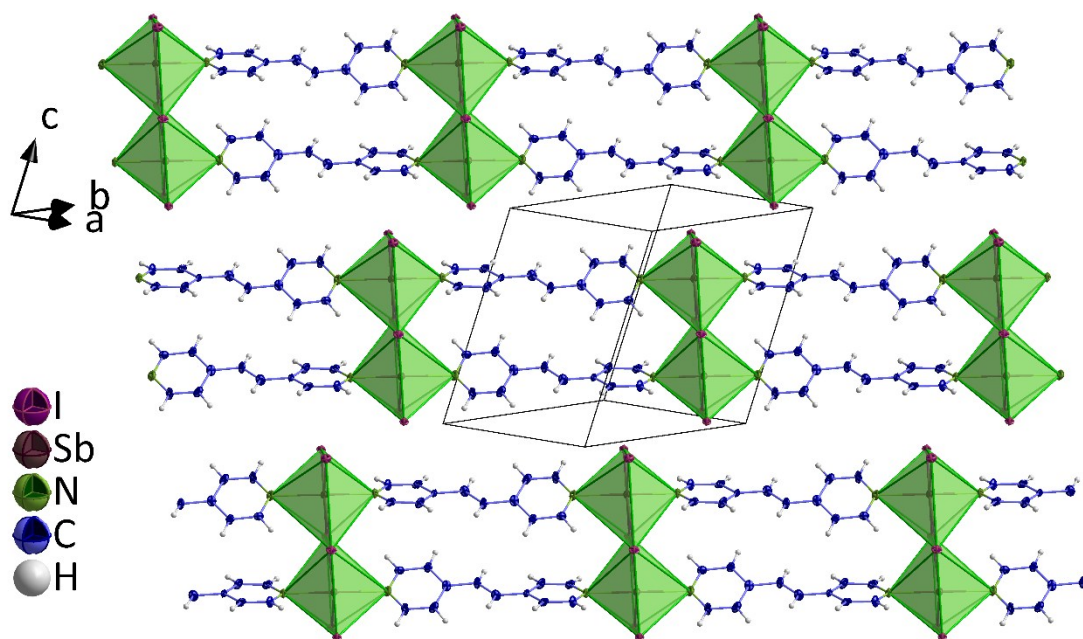

**Figure S3.** Depiction of the Sb coordination (top) and excerpt of the crystal structure displaying the linear double-strands in  ${}^1\infty[\text{Sb}_2\text{I}_6(\text{bpe})_2]$  (**1c**). Symmetry operations: I :  $2-x, 1-y, 1-z$ ; II:  $1+x, 1+y, +z$ .

## Crystallographic details for 2a-c

Table S5 Crystallographic data for 2a-c.

|                                                                                    | 2a                                                                | 2a'                                                               | 2b                                                                | 2c                                                               |
|------------------------------------------------------------------------------------|-------------------------------------------------------------------|-------------------------------------------------------------------|-------------------------------------------------------------------|------------------------------------------------------------------|
| Empirical formula                                                                  | C <sub>12</sub> H <sub>12</sub> Cl <sub>3</sub> N <sub>2</sub> Sb | C <sub>12</sub> H <sub>12</sub> Cl <sub>3</sub> N <sub>2</sub> Sb | C <sub>12</sub> H <sub>12</sub> Br <sub>3</sub> N <sub>2</sub> Sb | C <sub>12</sub> H <sub>12</sub> I <sub>3</sub> N <sub>2</sub> Sb |
| Formula weight /g·mol <sup>-1</sup>                                                | 412.34                                                            | 412.34                                                            | 545.72                                                            | 686.69                                                           |
| Crystal color and shape                                                            | colourless plate                                                  | colourless plate                                                  | colourless block                                                  | yellow block                                                     |
| Crystal size                                                                       | 0.302 × 0.243 × 0.098                                             | 0.367 × 0.22 × 0.176                                              | 0.753 × 0.383 × 0.288                                             | 0.197 × 0.13 × 0.103                                             |
| Crystal system                                                                     | triclinic                                                         | triclinic                                                         | triclinic                                                         | triclinic                                                        |
| Space group                                                                        | <i>P</i> -1                                                       | <i>P</i> -1                                                       | <i>P</i> -1                                                       | <i>P</i> -1                                                      |
| <i>a</i> /Å                                                                        | 892.01(19)                                                        | 897.15(11)                                                        | 891.20(7)                                                         | 910.35(10)                                                       |
| <i>b</i> /Å                                                                        | 903.85(18)                                                        | 909.39(13)                                                        | 945.83(8)                                                         | 981.91(11)                                                       |
| <i>c</i> /Å                                                                        | 989.6(2)                                                          | 1018.97(15)                                                       | 1055.49(9)                                                        | 1097.15(13)                                                      |
| $\alpha$ /°                                                                        | 73.326(7)                                                         | 70.894(4)                                                         | 68.216(2)                                                         | 66.414(3)                                                        |
| $\beta$ /°                                                                         | 72.259(7)                                                         | 73.050(3)                                                         | 71.675(2)                                                         | 73.361(3)                                                        |
| $\gamma$ /°                                                                        | 76.842(7)                                                         | 77.176(3)                                                         | 80.174(2)                                                         | 84.398(3)                                                        |
| <i>V</i> /Å <sup>3</sup>                                                           | 719.3(3)                                                          | 744.02(18)                                                        | 782.80(11)                                                        | 861.00(17)                                                       |
| <i>Z</i>                                                                           | 2                                                                 | 2                                                                 | 2                                                                 | 2                                                                |
| $\rho_{\text{calc}}$ /g·cm <sup>-3</sup>                                           | 1.904                                                             | 1.841                                                             | 2.315                                                             | 2.649                                                            |
| <i>F</i> (000)                                                                     | 400.0                                                             | 400.0                                                             | 508.0                                                             | 616.0                                                            |
| $\mu(\text{MoK}\alpha)$ /cm <sup>-1</sup>                                          | 2.458                                                             | 2.376                                                             | 9.403                                                             | 6.967                                                            |
| Temperature/K                                                                      | 100                                                               | 300                                                               | 200                                                               | 100                                                              |
| 2 $\theta$ range /°                                                                | 4.446 - 53.602                                                    | 4.356 - 50.036                                                    | 4.322 - 61.324                                                    | 4.208 - 56.678                                                   |
| No. of measured reflections                                                        | 13412                                                             | 13861                                                             | 19689                                                             | 35032                                                            |
| No. of independent reflections                                                     | 3054                                                              | 2632                                                              | 4810                                                              | 4292                                                             |
| <i>R</i> (int)                                                                     | 0.0974                                                            | 0.1160                                                            | 0.0548                                                            | 0.0650                                                           |
| <i>R</i> <sub>1</sub> ( <i>I</i> > 2 $\sigma$ ( <i>I</i> ))                        | 0.0526                                                            | 0.0411                                                            | 0.0401                                                            | 0.0240                                                           |
| <i>R</i> <sub>1</sub> (all data)                                                   | 0.0842                                                            | 0.0583                                                            | 0.0583                                                            | 0.0318                                                           |
| <i>wR</i> <sub>2</sub> (all data)                                                  | 0.1275                                                            | 0.1019                                                            | 0.0902                                                            | 0.0510                                                           |
| <i>S</i> (all data)                                                                | 1.004                                                             | 1.034                                                             | 1.038                                                             | 1.032                                                            |
| $\Delta\rho_{\text{max}}, \Delta\rho_{\text{min}}$ /e <sup>-</sup> Å <sup>-3</sup> | 1.38 / -2.43                                                      | 0.77 / -1.06                                                      | 1.533 / -1.729                                                    | 0.943 / -0.918                                                   |

Table S6: Selected interatomic distances (in Å) and angles (in °) in 2a.

Symmetry operations: I: 1-x, 1-y, 1-z; II: -1+x, -1+y, +z

|                      |            |                          |           |                                       |            |
|----------------------|------------|--------------------------|-----------|---------------------------------------|------------|
| Sb1 Cl3              | 2.865(2)   | Cl2 Sb1 Cl3              | 173.04(5) | N1 Sb1 Cl2                            | 89.01(15)  |
| Sb1 Cl2              | 2.4285(18) | Cl1 Sb1 Cl3              | 88.35(6)  | N1 Sb1 Cl3 <sup>I</sup>               | 86.19(15)  |
| Sb1 Cl1              | 2.3992(18) | Cl1 Sb1 Cl2              | 91.38(7)  | N2 <sup>II</sup> Sb1 Cl3              | 99.69(14)  |
| Sb1 Cl3 <sup>I</sup> | 3.125(2)   | Cl1 Sb1 Cl3 <sup>I</sup> | 171.92(5) | N2 <sup>II</sup> Sb1 Cl2              | 87.19(14)  |
| Sb1 N1               | 2.332(5)   | Cl1 Sb1 N1               | 86.38(15) | N2 <sup>II</sup> Sb1 Cl1              | 83.87(13)  |
| Sb1 N2 <sup>II</sup> | 2.501(5)   | Cl3 <sup>I</sup> Sb1 Cl3 | 94.02(5)  | N2 <sup>II</sup> Sb1 Cl3 <sup>I</sup> | 103.31(13) |
|                      |            | Cl3 <sup>I</sup> Sb1 Cl2 | 85.33(6)  | N2 <sup>II</sup> Sb1 N1               | 169.4(2)   |
|                      |            | N1 Sb1 Cl3               | 84.03(15) |                                       |            |



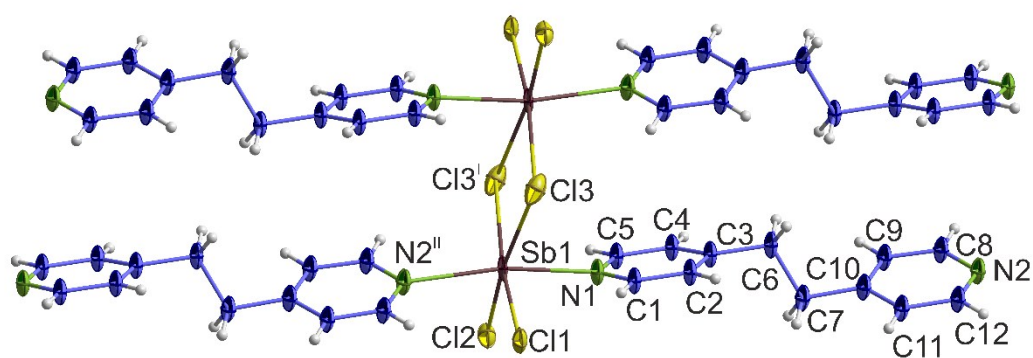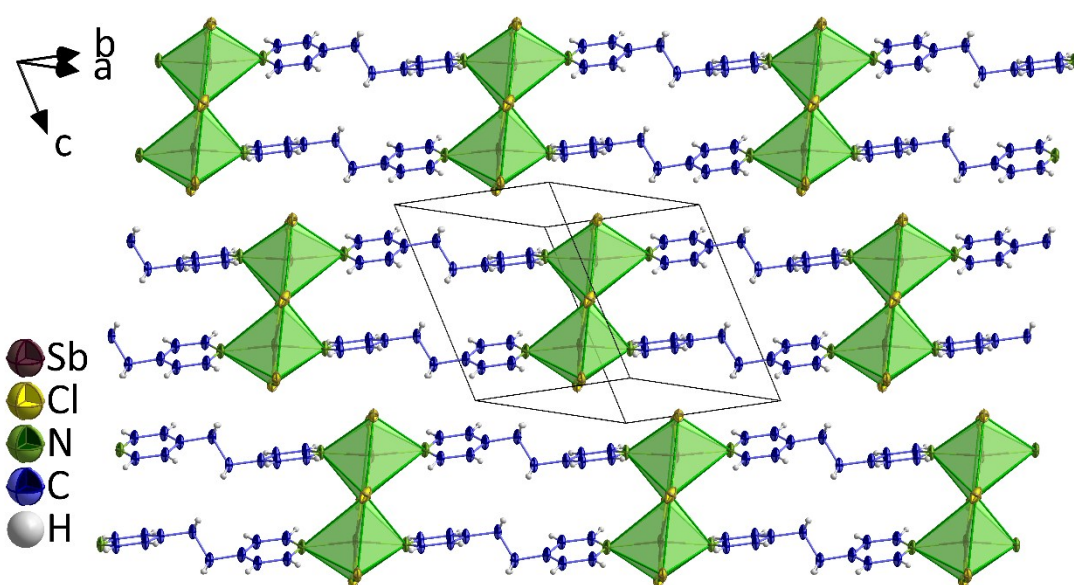

**Figure S4.** Depiction of the Sb coordination (top) and excerpt of the crystal structure displaying the linear double-strands in  $\left[ \text{Sb}_2\text{Cl}_6(\text{bpa})_2 \right]$  (**2a**). Symmetry operations: I:  $-1-x, 1-y, 1-z$ ; II:  $-1+x, -1+y, +z$ .

**Table S7:** Selected interatomic distances (in Å) and angles (in °) in **2a'**.

Symmetry operations: I: 1-x, 1-y, 1-z; II: -1+x, -1+y, +z

|                      |            |                          |           |                                       |            |
|----------------------|------------|--------------------------|-----------|---------------------------------------|------------|
| Sb1 Cl3              | 2.9816(18) | Cl2 Sb1 Cl3              | 174.80(6) | N1 Sb1 Cl2                            | 87.18(11)  |
| Sb1 Cl2              | 2.4223(13) | Cl1 Sb1 Cl3              | 85.79(6)  | N1 Sb1 Cl3 <sup>I</sup>               | 83.27(13)  |
| Sb1 Cl1              | 2.4072(17) | Cl1 Sb1 Cl2              | 91.58(6)  | N2 <sup>II</sup> Sb1 Cl3              | 98.50(11)  |
| Sb1 Cl3 <sup>I</sup> | 3.004(2)   | Cl1 Sb1 Cl3 <sup>I</sup> | 170.98(6) | N2 <sup>II</sup> Sb1 Cl2              | 85.80(11)  |
| Sb1 N1               | 2.345(5)   | Cl1 Sb1 N1               | 88.04(13) | N2 <sup>II</sup> Sb1 Cl1              | 86.52(12)  |
| Sb1 N2 <sup>II</sup> | 2.518(5)   | Cl3 <sup>I</sup> Sb1 Cl3 | 91.54(5)  | N2 <sup>II</sup> Sb1 Cl3 <sup>I</sup> | 102.41(12) |
|                      |            | Cl3 <sup>I</sup> Sb1 Cl2 | 90.38(6)  | N2 <sup>II</sup> Sb1 N1               | 170.98(15) |
|                      |            | N1 Sb1 Cl3               | 88.25(11) |                                       |            |

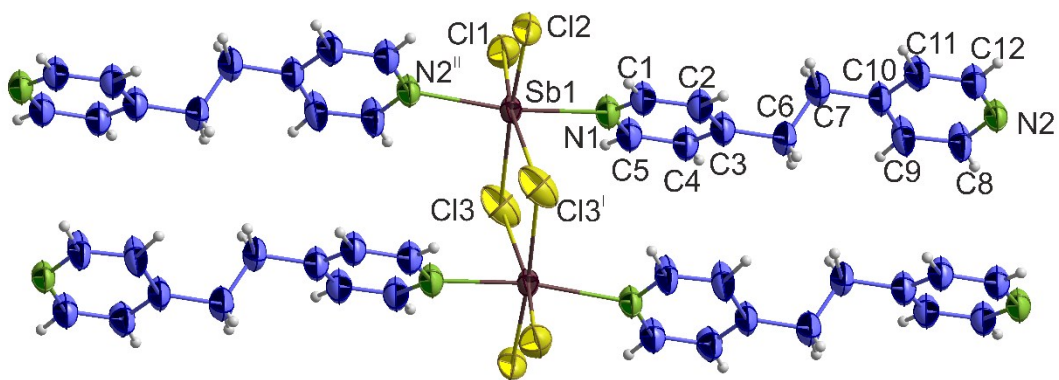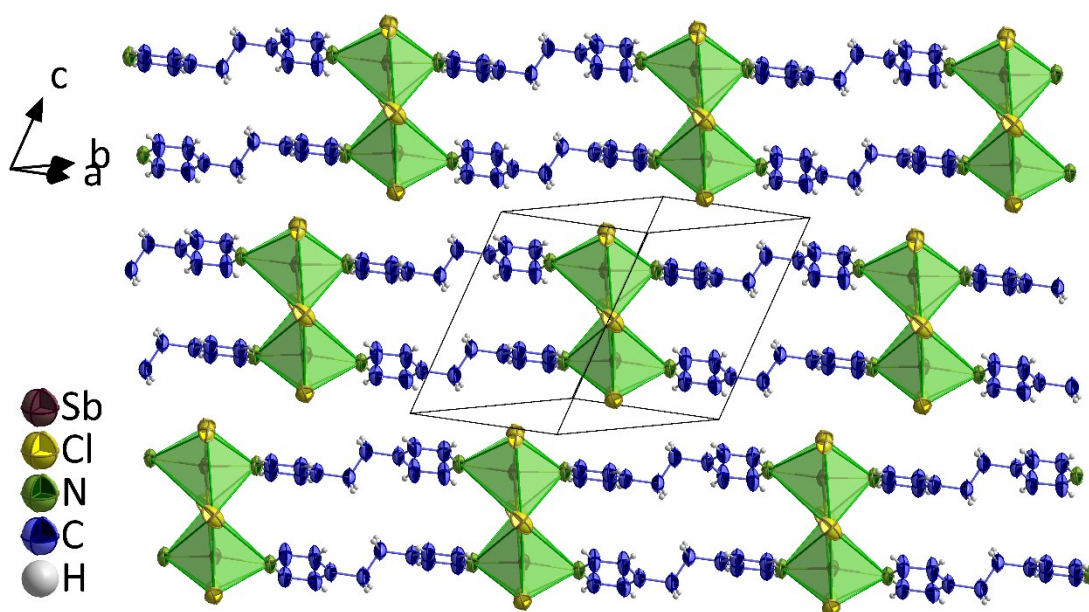

**Figure S5.** Depiction of the Sb coordination (top) and excerpt of the crystal structure displaying the linear double-strands in  $\infty^1$ - $[\text{Sb}_2\text{Cl}_6(\text{bpa})_2]$  (**2a'**). Symmetry operations: I :  $1-x, 1-y, 1-z$ ; II:  $-1+x, -1+y, +z$ .

**Table S8:** Selected interatomic distances (in Å) and angles (in °) in **2b**.

Symmetry operations: I: 1-x, -y, 1-z; II: 1+x, 1+y, +z

|                      |           |                          |            |                                       |            |
|----------------------|-----------|--------------------------|------------|---------------------------------------|------------|
| Sb1 Br3              | 3.0719(6) | Br2 Sb1 Br3              | 178.17(2)  | N1 Sb1 Br2                            | 88.39(10)  |
| Sb1 Br2              | 2.5803(6) | Br1 Sb1 Br3              | 89.349(19) | N1 Sb1 Br3 <sup>I</sup>               | 91.28(10)  |
| Sb1 Br1              | 2.5802(6) | Br1 Sb1 Br2              | 92.24(2)   | N2 <sup>II</sup> Sb1 Br3              | 92.45(10)  |
| Sb1 Br3 <sup>I</sup> | 3.1364(6) | Br1 Sb1 Br3 <sup>I</sup> | 178.13(2)  | N2 <sup>II</sup> Sb1 Br2              | 88.55(10)  |
| Sb1 N1               | 2.397(3)  | Br1 Sb1 N1               | 88.24(10)  | N2 <sup>II</sup> Sb1 Br1              | 86.80(10)  |
| Sb1 N2 <sup>II</sup> | 2.474(4)  | Br3 <sup>I</sup> Sb1 Br3 | 92.463(16) | N2 <sup>II</sup> Sb1 Br3 <sup>I</sup> | 93.58(10)  |
|                      |           | Br3 <sup>I</sup> Sb1 Br2 | 85.942(19) | N2 <sup>II</sup> Sb1 N1               | 174.06(14) |
|                      |           | N1 Sb1 Br3               | 90.76(10)  |                                       |            |

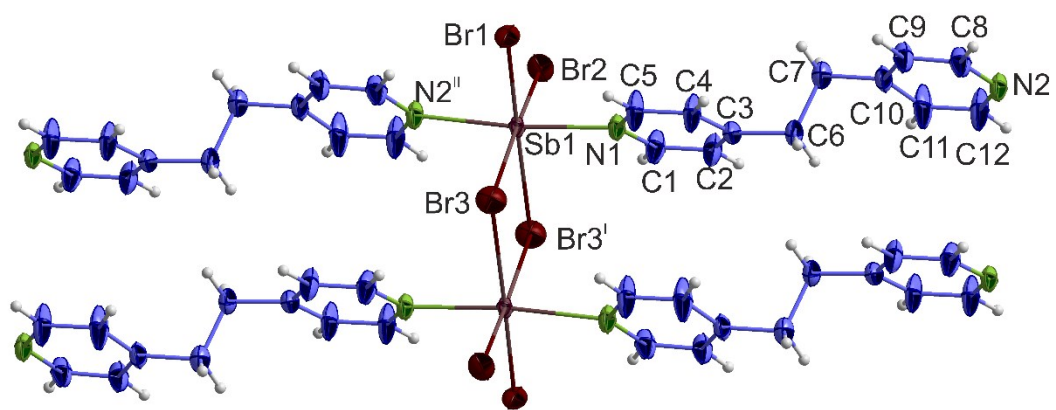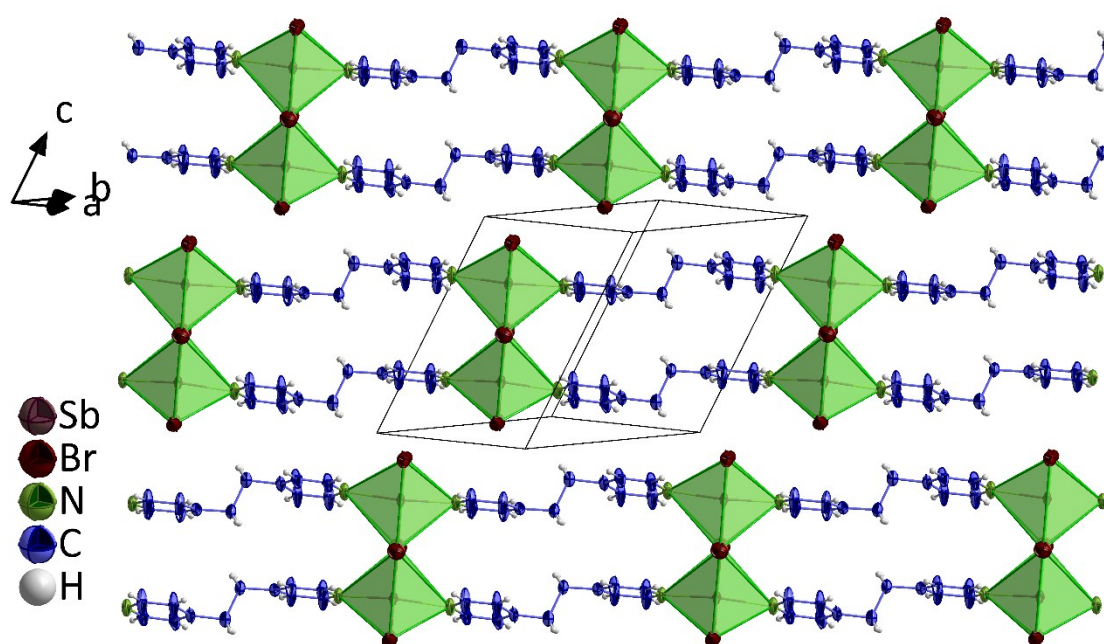

**Figure S6.** Depiction of the Sb coordination (top) and excerpt of the crystal structure displaying the linear double-strands in  $1_{\infty}[\text{Sb}_2\text{Br}_6(\text{bpa})_2]$  (**2b**). Symmetry operations: I:  $1-x, -y, 1-z$ ; II:  $1+x, 1+y, +z$ .

**Table S9:** Selected interatomic distances (in Å) and angles (in °) in **2c**.

Symmetry operations: I: 1-x, 2-y, 1-z; II: 1+x, 1+y, +z

|                      |           |                        |             |                                      |            |
|----------------------|-----------|------------------------|-------------|--------------------------------------|------------|
| Sb1 I3               | 3.2658(4) | I2 Sb1 I3              | 88.279(12)  | N1 Sb1 I2                            | 89.24(7)   |
| Sb1 I2               | 2.8092(4) | I1 Sb1 I3              | 179.187(11) | N1 Sb1 I3 <sup>I</sup>               | 91.12(7)   |
| Sb1 I1               | 2.8024(4) | I1 Sb1 I2              | 92.493(14)  | N2 <sup>II</sup> Sb1 I3              | 92.31(8)   |
| Sb1 I3 <sup>I</sup>  | 3.2810(4) | I1 Sb1 I3 <sup>I</sup> | 86.338(13)  | N2 <sup>II</sup> Sb1 I2              | 87.65(7)   |
| Sb1 N1               | 2.422(3)  | I1 Sb1 N1              | 89.42(7)    | N2 <sup>II</sup> Sb1 I1              | 87.98(8)   |
| Sb1 N2 <sup>II</sup> | 2.479(3)  | I3 <sup>I</sup> Sb1 I3 | 92.892(12)  | N2 <sup>II</sup> Sb1 I3 <sup>I</sup> | 91.93(7)   |
|                      |           | I3 <sup>I</sup> Sb1 I2 | 178.772(11) | N2 <sup>II</sup> Sb1 N1              | 175.86(10) |
|                      |           | N1 Sb1 I3              | 90.33(7))   |                                      |            |

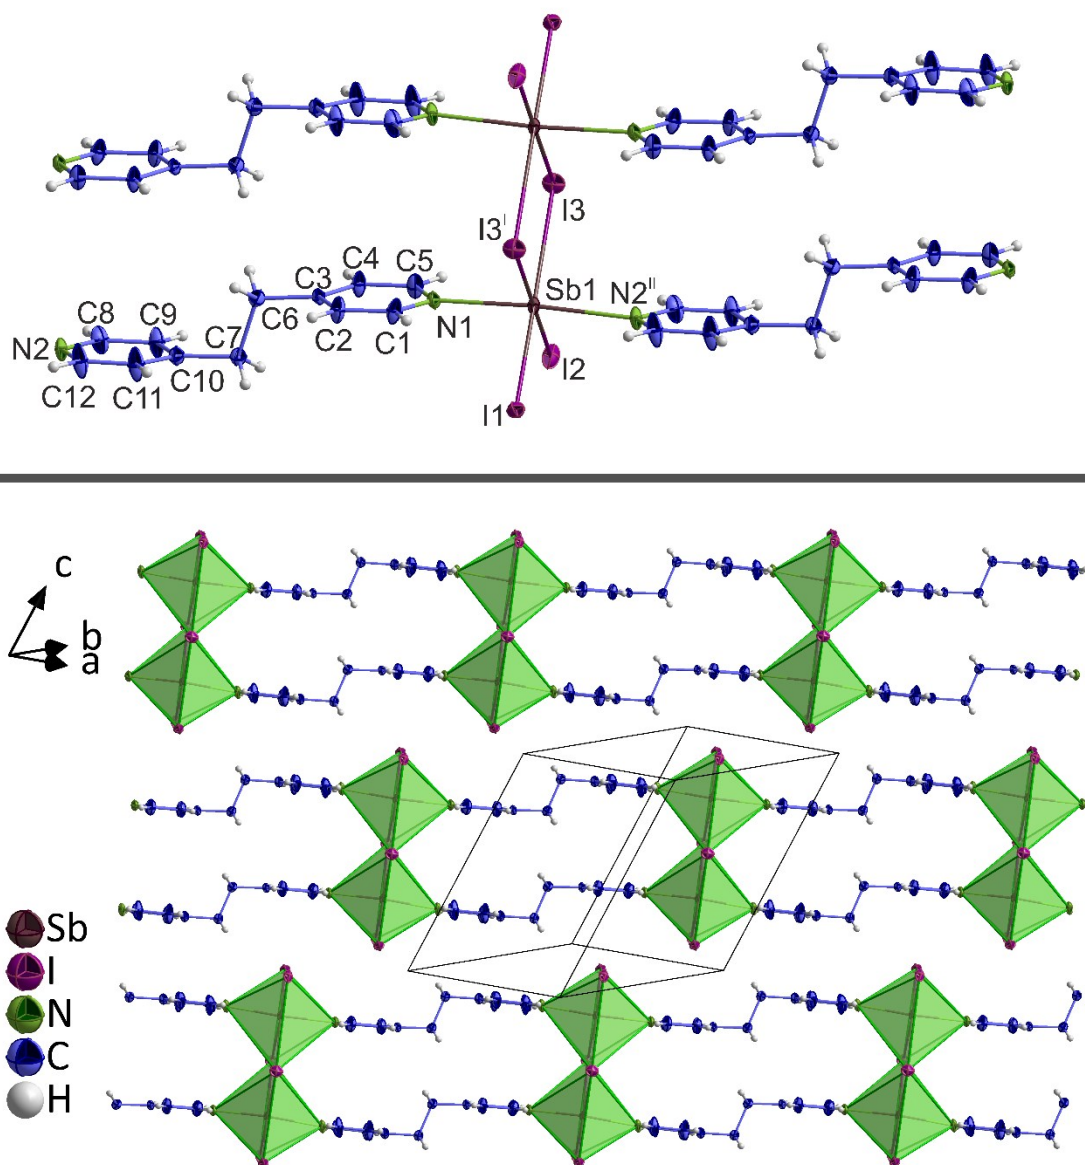

**Figure S7.** Depiction of the Sb coordination (top) and excerpt of the crystal structure displaying the linear double-strands in  ${}^1\infty[\text{Sb}_2\text{I}_6(\text{bpa})_2]$  (**2c**). Symmetry operations: I:  $1-x, 2-y, 1-z$ ; II:  $1+x, 1+y, +z$ .

## Crystallographic details for 3a-c

Table S10 Crystallographic data for 3a-c.

|                                                                          | 3a                                                               | 3b                                                               | 3c                                                              |
|--------------------------------------------------------------------------|------------------------------------------------------------------|------------------------------------------------------------------|-----------------------------------------------------------------|
| Empirical formula                                                        | C <sub>10</sub> H <sub>8</sub> Cl <sub>3</sub> N <sub>2</sub> Sb | C <sub>10</sub> H <sub>8</sub> Br <sub>3</sub> N <sub>2</sub> Sb | C <sub>10</sub> H <sub>8</sub> I <sub>3</sub> N <sub>2</sub> Sb |
| Formula weight /g·mol <sup>-1</sup>                                      | 384.28                                                           | 517.66                                                           | 658.63                                                          |
| Crystal color and shape                                                  | colourless block                                                 | colourless block                                                 | yellow plate                                                    |
| Crystal size                                                             | 0.257 × 0.212 × 0.079                                            | 0.257 × 0.212 × 0.079                                            | 0.175 × 0.153 × 0.062                                           |
| Crystal system                                                           | monoclinic                                                       | monoclinic                                                       | triclinic                                                       |
| Space group                                                              | <i>P</i> 2 <sub>1</sub> / <i>c</i>                               | <i>P</i> 2 <sub>1</sub> / <i>c</i>                               | <i>P</i> -1                                                     |
| <i>a</i> /Å                                                              | 962.10(19)                                                       | 1010.8(2)                                                        | 762.51(5)                                                       |
| <i>b</i> /Å                                                              | 1154.5(2)                                                        | 1189.5(2)                                                        | 998.46(6)                                                       |
| <i>c</i> /Å                                                              | 1187.6(2)                                                        | 1192.2(2)                                                        | 1075.50(7)                                                      |
| $\alpha$ /°                                                              | 90                                                               | 90                                                               | 117.048(3)                                                      |
| $\beta$ /°                                                               | 109.13(3)                                                        | 109.549(5)                                                       | 90.144(3)                                                       |
| $\gamma$ /°                                                              | 90                                                               | 90                                                               | 95.474(3)                                                       |
| <i>V</i> /Å <sup>3</sup>                                                 | 1246.2(5)                                                        | 1350.8(5)                                                        | 724.96(8)                                                       |
| <i>Z</i>                                                                 | 4                                                                | 4                                                                | 2                                                               |
| $\rho_{\text{calc}}$ /g·cm <sup>-3</sup>                                 | 2.048                                                            | 2.545                                                            | 3.017                                                           |
| <i>F</i> (000)                                                           | 736.0                                                            | 952.0                                                            | 584.0                                                           |
| $\mu$ (MoK $\alpha$ ) /cm <sup>-1</sup>                                  | 2.829                                                            | 10.891                                                           | 8.268                                                           |
| Temperature/K                                                            | 100                                                              | 100                                                              | 100                                                             |
| 2 $\theta$ range /°                                                      | 4.482 - 56.71                                                    | 4.276 - 56.658                                                   | 4.258 - 56.552                                                  |
| No. of measured reflections                                              | 16387                                                            | 23837                                                            | 6188                                                            |
| No. of independent reflections                                           | 3106                                                             | 3361                                                             | 4422                                                            |
| <i>R</i> (int)                                                           | 0.0516                                                           | 0.0850                                                           | 0.0850                                                          |
| <i>R</i> <sub>1</sub> ( <i>I</i> > 2 $\sigma$ ( <i>I</i> ))              | 0.0340                                                           | 0.0314                                                           | 0.0348                                                          |
| <i>R</i> <sub>1</sub> (all data)                                         | 0.0456                                                           | 0.0491                                                           | 0.0396                                                          |
| <i>wR</i> <sub>2</sub> (all data)                                        | 0.0867                                                           | 0.0601                                                           | 0.0877                                                          |
| <i>S</i> (all data)                                                      | 1.063                                                            | 1.018                                                            | 1.003                                                           |
| $\Delta\rho_{\text{max}}$ , $\Delta\rho_{\text{min}}$ /e·Å <sup>-3</sup> | 2.402 / -1.578                                                   | 0.847 / -1.357                                                   | 1.44 / -1.08                                                    |

Table S11: Selected interatomic distances (in Å) and angles (in °) in 3a.

Symmetry operations: *l* : 1+x,+y,-1+z

|                     |            |             |           |                         |            |
|---------------------|------------|-------------|-----------|-------------------------|------------|
| Sb1 Cl3             | 2.7376(11) | Cl2 Sb1 Cl3 | 169.57(3) | N1 Sb1 Cl2              | 87.25(8)   |
| Sb1 Cl2             | 2.4717(10) | Cl1 Sb1 Cl3 | 86.78(4)  | N2 <sup>l</sup> Sb1 Cl3 | 97.00(8)   |
| Sb1 Cl1             | 2.3725(10) | Cl1 Sb1 Cl2 | 90.94(3)  | N2 <sup>l</sup> Sb1 Cl2 | 92.82(8)   |
| Sb1 N1              | 2.309(3)   | Cl1 Sb1 N1  | 86.80(9)  | N2 <sup>l</sup> Sb1 Cl1 | 83.08(8)   |
| Sb1 N2 <sup>l</sup> | 2.538(3)   | N1 Sb1 Cl3  | 82.47(8)  | N2 <sup>l</sup> Sb1 N1  | 169.88(10) |



**Table S12:** Selected interatomic distances (in Å) and angles (in °) in **3b**.

Symmetry operations: I: 1-x, 1-y, -z; II: +x, +y, 1+z

|                      |           |                          |             |                                       |            |
|----------------------|-----------|--------------------------|-------------|---------------------------------------|------------|
| Sb1 Br3              | 2.9012(7) | Br2 Sb1 Br3              | 171.420(17) | N1 Sb1 Br2                            | 88.39(8)   |
| Sb1 Br2              | 2.6276(6) | Br1 Sb1 Br3              | 88.99(2)    | N1 Sb1 Br3 <sup>I</sup>               | 88.71(9)   |
| Sb1 Br1              | 2.5304(6) | Br1 Sb1 Br2              | 91.96(2)    | N2 <sup>II</sup> Sb1 Br3              | 94.33(8)   |
| Sb1 Br3 <sup>I</sup> | 3.3442(7) | Br1 Sb1 Br3 <sup>I</sup> | 175.873(16) | N2 <sup>II</sup> Sb1 Br2              | 94.25(8)   |
| Sb1 N1               | 2.325(3)  | Br1 Sb1 N1               | 87.70(9)    | N2 <sup>II</sup> Sb1 Br1              | 86.80(10)  |
| Sb1 N2 <sup>II</sup> | 2.563(4)  | Br3 <sup>I</sup> Sb1 Br3 | 92.61(2)    | N2 <sup>II</sup> Sb1 Br3 <sup>I</sup> | 99.06(8)   |
|                      |           | Br3 <sup>I</sup> Sb1 Br2 | 85.90(2)    | N2 <sup>II</sup> Sb1 N1               | 171.95(11) |
|                      |           | N1 Sb1 Br3               | 83.13(8)    |                                       |            |

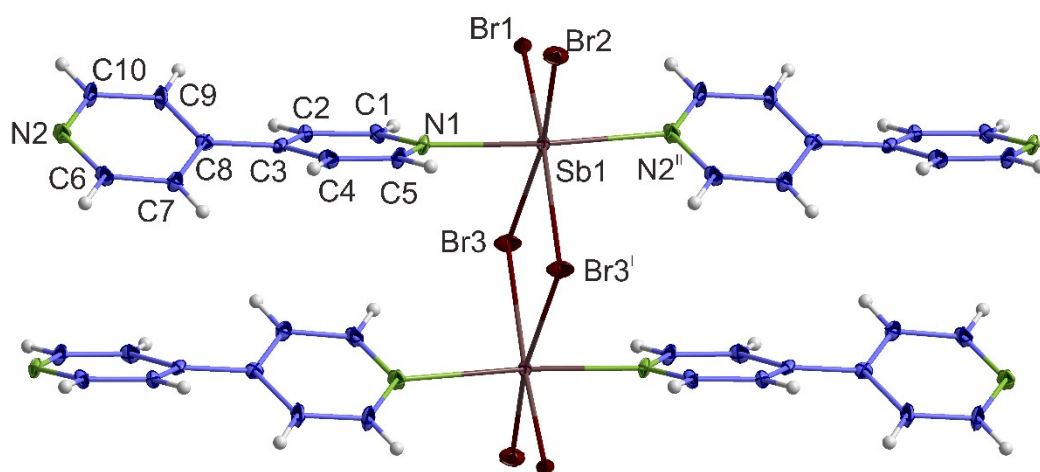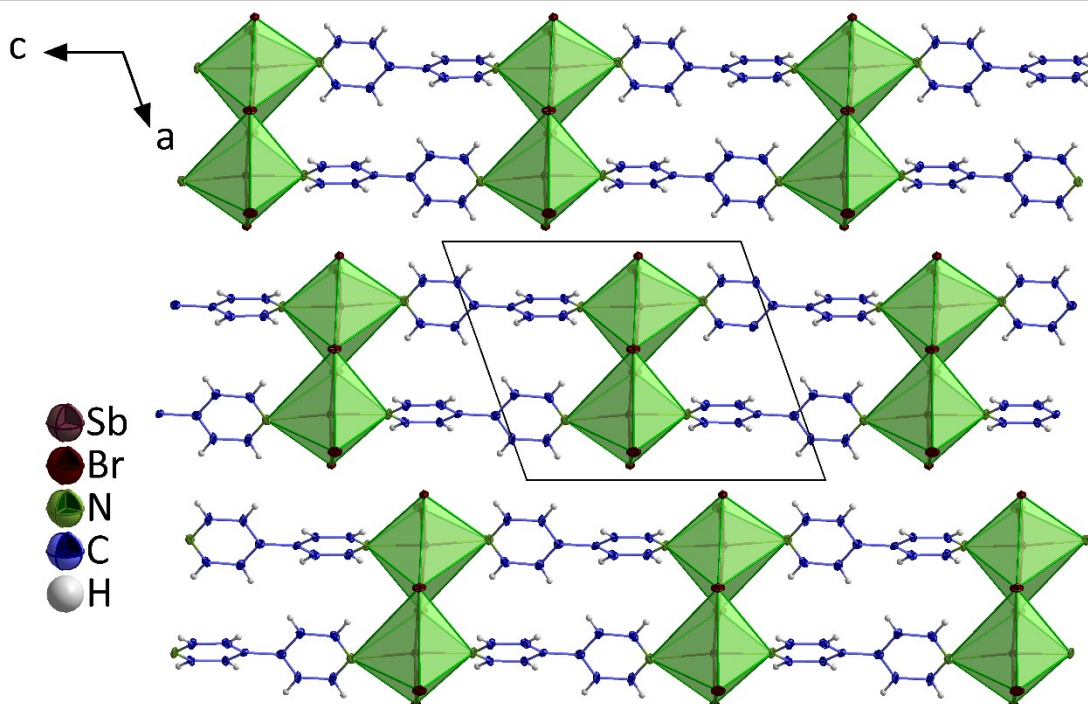

**Figure S8.** Depiction of the Sb coordination (top) and excerpt of the crystal structure displaying the linear double-strands in  $1_{\infty}[\text{Sb}_2\text{Br}_6(\text{bipy})_2]$  (**3b**). Symmetry operations: I :  $1-x, 1-y, -z$ ; II:  $+x, +y, 1+z$ .

**Table S13:** Selected interatomic distances (in Å) and angles (in °) in **3c**.  
Symmetry operations: I: 1-x, 1-y, 1-z; II: +x, +y, 1+z

|                      |           |                        |           |                                      |           |
|----------------------|-----------|------------------------|-----------|--------------------------------------|-----------|
| Sb1 I3               | 3.1429(8) | I2 Sb1 I3              | 174.05(2) | N1 Sb1 I2                            | 89.54(16) |
| Sb1 I2               | 2.8698(8) | I1 Sb1 I3              | 89.07(2)  | N1 Sb1 I3 <sup>I</sup>               | 89.41(17) |
| Sb1 I1               | 2.7762(8) | I1 Sb1 I2              | 91.03(2)  | N2 <sup>II</sup> Sb1 I3              | 91.48(16) |
| Sb1 I3 <sup>I</sup>  | 3.4456(8) | I1 Sb1 I3 <sup>I</sup> | 178.04(2) | N2 <sup>II</sup> Sb1 I2              | 94.47(16) |
| Sb1 N1               | 2.410(6)  | I1 Sb1 N1              | 89.03(17) | N2 <sup>II</sup> Sb1 I1              | 88.84(16) |
| Sb1 N2 <sup>II</sup> | 2.529(6)  | I3 <sup>I</sup> Sb1 I3 | 91.96(2)  | N2 <sup>II</sup> Sb1 I3 <sup>I</sup> | 92.79(16) |
|                      |           | I3 <sup>I</sup> Sb1 I2 | 87.77(2)  | N2 <sup>II</sup> Sb1 N1              | 175.5(2)  |
|                      |           | N1 Sb1 I3              | 84.52(16) |                                      |           |

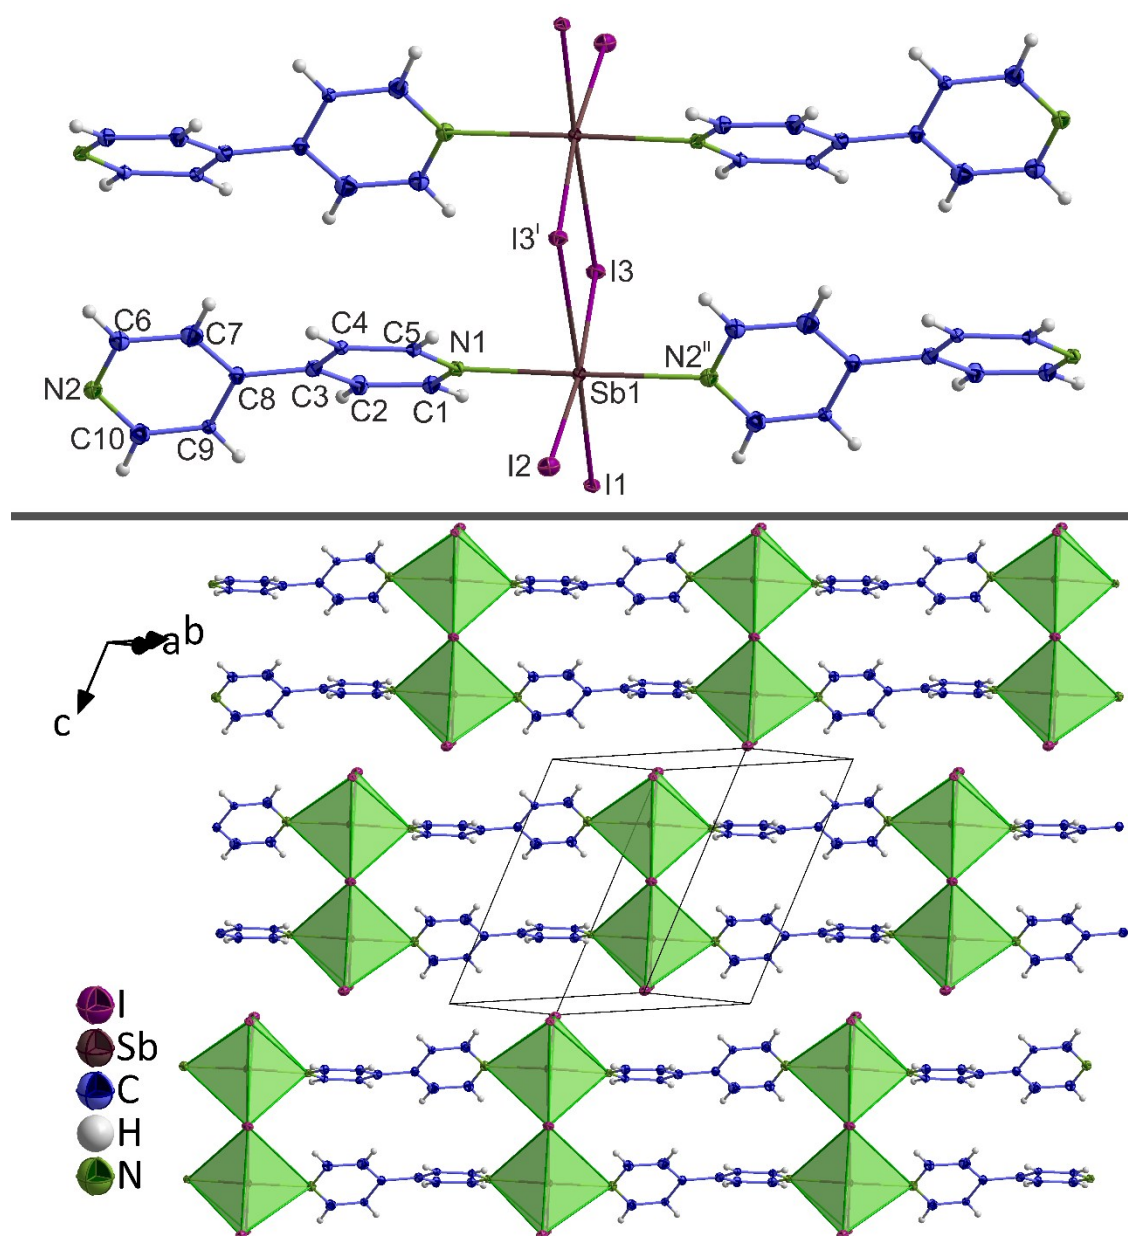

**Figure S9.** Depiction of the Sb coordination (top) and excerpt of the crystal structure displaying the linear double-strands in  $[\text{Sb}_2\text{I}_6(\text{bipy})_2]$  (**3c**). Symmetry operations: I :  $1-x, 1-y, 1-z$ ; II:  $+x, +y, 1+z$ .

## Crystallographic details for 4a-c

Table S14 Crystallographic data for 4a.

|                                                                                    | 4a                                                               | 4b                                                               | 4c                                                              |
|------------------------------------------------------------------------------------|------------------------------------------------------------------|------------------------------------------------------------------|-----------------------------------------------------------------|
| Empirical formula                                                                  | C <sub>12</sub> H <sub>10</sub> BiCl <sub>3</sub> N <sub>2</sub> | C <sub>12</sub> H <sub>10</sub> BiBr <sub>3</sub> N <sub>2</sub> | C <sub>12</sub> H <sub>10</sub> BiI <sub>3</sub> N <sub>2</sub> |
| Formula weight /g·mol <sup>-1</sup>                                                | 497.55                                                           | 630.93                                                           | 771.90                                                          |
| Crystal color and shape                                                            | colourless block                                                 | colourless block                                                 | orange plate                                                    |
| Crystal size                                                                       | 0.253 × 0.189 × 0.103                                            | 0.115 × 0.07 × 0.068                                             | 0.136 × 0.121 × 0.063                                           |
| Crystal system                                                                     | triclinic                                                        | triclinic                                                        | triclinic                                                       |
| Space group                                                                        | <i>P</i> -1                                                      | <i>P</i> -1                                                      | <i>P</i> $\bar{1}$                                              |
| <i>a</i> /pm                                                                       | 880.98(7)                                                        | 904.34(9)                                                        | 898.14(5)                                                       |
| <i>b</i> /pm                                                                       | 924.39(8)                                                        | 919.19(9)                                                        | 964.54(5)                                                       |
| <i>c</i> /pm                                                                       | 992.41(8)                                                        | 1011.119(10)                                                     | 1070.022(6)                                                     |
| $\alpha$ /°                                                                        | 74.791(3)                                                        | 77.649(3)                                                        | 67.547(2)                                                       |
| $\beta$ /°                                                                         | 65.696(3)                                                        | 65.792(3)                                                        | 84.936(2)                                                       |
| $\gamma$ /°                                                                        | 74.641(3)                                                        | 75.676(3)                                                        | 78.170(2)                                                       |
| <i>V</i> /10 <sup>6</sup> · pm <sup>3</sup>                                        | 699.36(10)                                                       | 736.7(13)                                                        | 838.59(8)                                                       |
| <i>Z</i>                                                                           | 2                                                                | 2                                                                | 2                                                               |
| $\rho_{\text{calc}}$ /g·cm <sup>-3</sup>                                           | 2.363                                                            | 2.844                                                            | 3.057                                                           |
| $\mu(\text{MoK}\alpha)$ /cm <sup>-1</sup>                                          | 13.160                                                           | 20.083                                                           | 16.021                                                          |
| <i>F</i> (000)                                                                     | 460.0                                                            | 568.0                                                            | 676.0                                                           |
| Temperature/K                                                                      | 200                                                              | 100                                                              | 100                                                             |
| Min/max transmission                                                               | 0.4449/0.7461                                                    | 0.290434/0.430169                                                | 0.225030/0.430176                                               |
| 2 $\theta$ range /°                                                                | 4.574 - 54.436                                                   | 4.452 - 54.362                                                   | 4.118 - 54.444                                                  |
| No. of measured reflections                                                        | 29273                                                            | 14978                                                            | 39316                                                           |
| No. of independent reflections                                                     | 3112                                                             | 3275                                                             | 3754                                                            |
| <i>R</i> (int)                                                                     | 0.0672                                                           | 0.0731                                                           | 0.0628                                                          |
| No. of parameters                                                                  | 164                                                              | 164                                                              | 164                                                             |
| <i>R</i> <sub>1</sub> ( <i>I</i> > 2 $\sigma$ ( <i>I</i> ))                        | 0.0239                                                           | 0.0273                                                           | 0.0260                                                          |
| <i>R</i> <sub>1</sub> (all data)                                                   | 0.0286                                                           | 0.0335                                                           | 0.0329                                                          |
| <i>wR</i> <sub>2</sub> (all data)                                                  | 0.0542                                                           | 0.0574                                                           | 0.0496                                                          |
| <i>S</i> (all data)                                                                | 1.068                                                            | 1.044                                                            | 1.057                                                           |
| $\Delta\rho_{\text{max}}, \Delta\rho_{\text{min}}$ /e <sup>-</sup> Å <sup>-3</sup> | 1.97/-1.21                                                       | 1.24/-0.86                                                       | 1.142 / -0.946                                                  |

Table S15: Selected interatomic distances (in Å) and angles (in °) in 4a.

Symmetry operations: I: 1-x,+2-y, 1-z; II: 1+x, 1+y, +z

|                      |            |                          |           |                                       |            |
|----------------------|------------|--------------------------|-----------|---------------------------------------|------------|
| Bi1 Cl3              | 2.9099(12) | Cl2 Bi1 Cl3              | 174.68(4) | N1 Bi1 Cl2                            | 91.43(9)   |
| Bi1 Cl2              | 2.5320(11) | Cl1 Bi1 Cl3              | 88.20(4)  | N1 Bi1 Cl3 <sup>I</sup>               | 88.88(9)   |
| Bi1 Cl1              | 2.5272(16) | Cl1 Bi1 Cl2              | 97.11(4)  | N2 <sup>II</sup> Bi1 Cl3              | 90.69(9)   |
| Bi1 Cl3 <sup>I</sup> | 2.9187(13) | Cl1 Bi1 Cl3 <sup>I</sup> | 173.92(3) | N2 <sup>II</sup> Bi1 Cl2              | 89.25(9)   |
| Bi1 N1               | 2.507(3)   | Cl1 Bi1 N1               | 89.54(9)  | N2 <sup>II</sup> Bi1 Cl1              | 90.46(9)   |
| Bi1 N2 <sup>II</sup> | 2.530(4)   | Cl3 <sup>I</sup> Bi1 Cl3 | 85.88(3)  | N2 <sup>II</sup> Bi1 Cl3 <sup>I</sup> | 91.05(9)   |
|                      |            | Cl3 <sup>I</sup> Bi1 Cl2 | 88.80(4)  | N2 <sup>II</sup> Bi1 N1               | 179.31(12) |
|                      |            | N1 Bi1 Cl3               | 88.63(9)  |                                       |            |

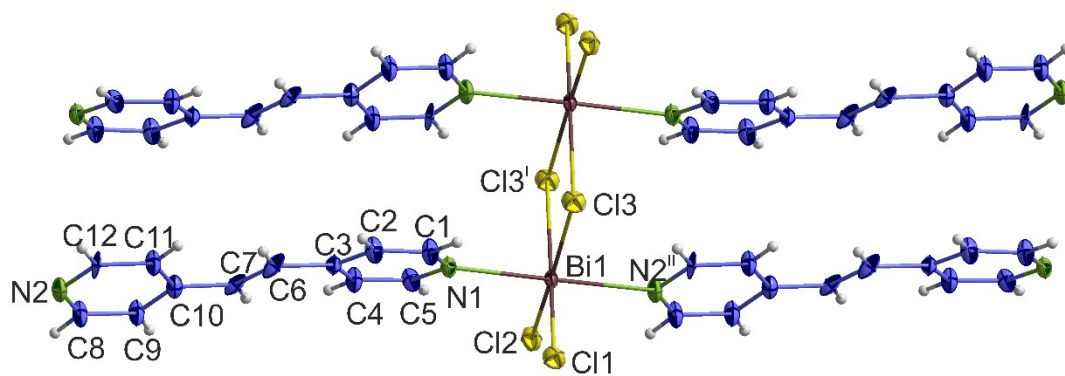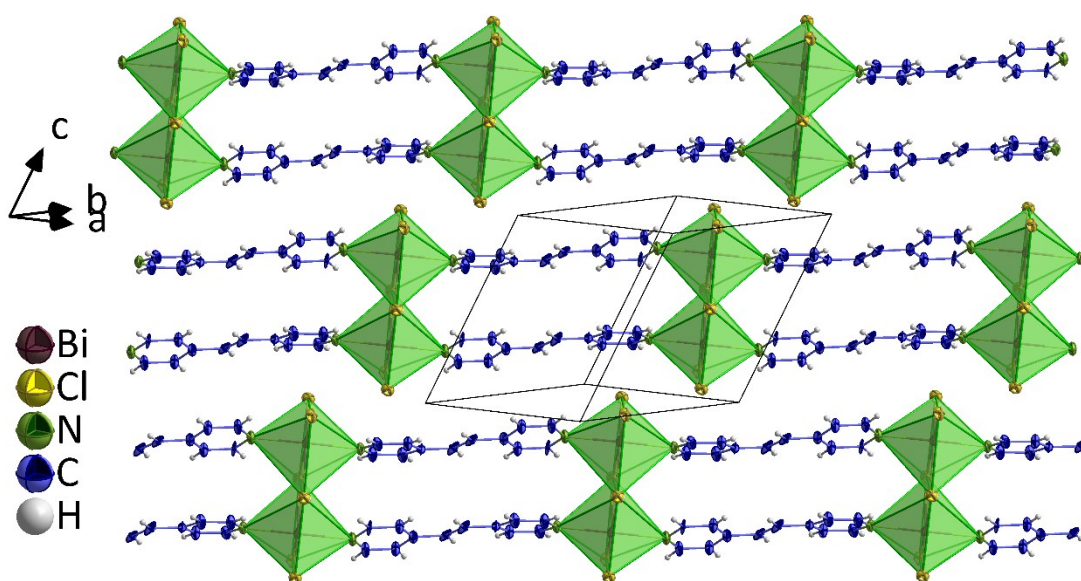

**Figure S10.** Depiction of the Bi coordination (top) and excerpt of the crystal structure displaying the linear double-strands in  $1_{\infty}[\text{Bi}_2\text{Cl}_6(\text{bpe})_2]$  (**4a**). Symmetry operations: I :  $1-x, +2-y, 1-z$ ; II:  $1+x, 1+y, +z$ .

**Table S16:** Selected interatomic distances (in Å) and angles (in °) in **4b**.  
Symmetry operations: I: 2-x,2-y, 1-z, II: 1+x, 1+y, +z

|                      |           |                          |           |                                       |            |
|----------------------|-----------|--------------------------|-----------|---------------------------------------|------------|
| Bi1 Br3              | 3.0459(7) | Br2 Bi1 Br3              | 87.72(2)  | N1 Bi1 Br2                            | 89.95(12)  |
| Bi1 Br2              | 2.6756(7) | Br1 Bi1 Br3              | 173.96(2) | N1 Bi1 Br3 <sup>I</sup>               | 89.97(12)  |
| Bi1 Br1              | 2.6709(7) | Br1 Bi1 Br2              | 96.71(2)  | N2 <sup>II</sup> Bi1 Br3              | 85.88(12)  |
| Bi1 Br3 <sup>I</sup> | 3.0489(7) | Br1 Bi1 Br3 <sup>I</sup> | 88.04(2)  | N2 <sup>II</sup> Bi1 Br2              | 91.94(12)  |
| Bi1 N1               | 2.556(5)  | Br1 Bi1 N1               | 91.05(12) | N2 <sup>II</sup> Bi1 Br1              | 89.86(12)  |
| Bi1 N2 <sup>II</sup> | 2.520(5)  | Br3 <sup>I</sup> Bi1 Br3 | 87.54(2)  | N2 <sup>II</sup> Bi1 Br3 <sup>I</sup> | 88.04(11)  |
|                      |           | Br3 <sup>I</sup> Bi1 Br2 | 175.25(2) | N2 <sup>II</sup> Bi1 N1               | 177.79(16) |
|                      |           | N1 Bi1 Br3               | 93.06(12) |                                       |            |

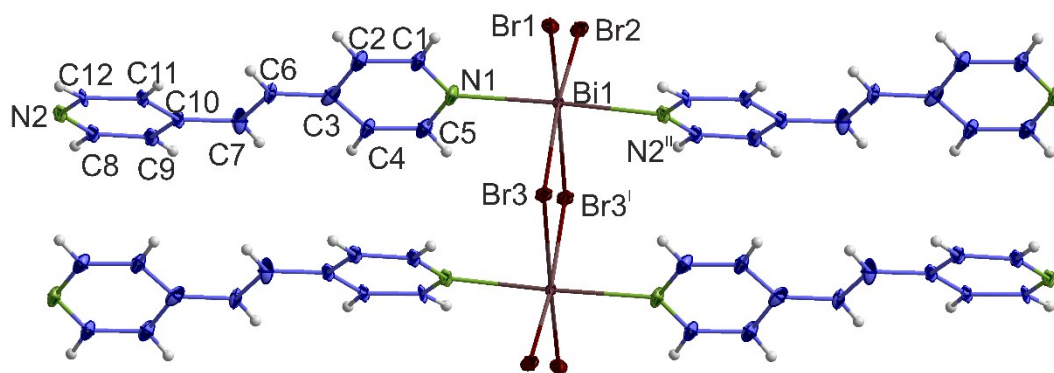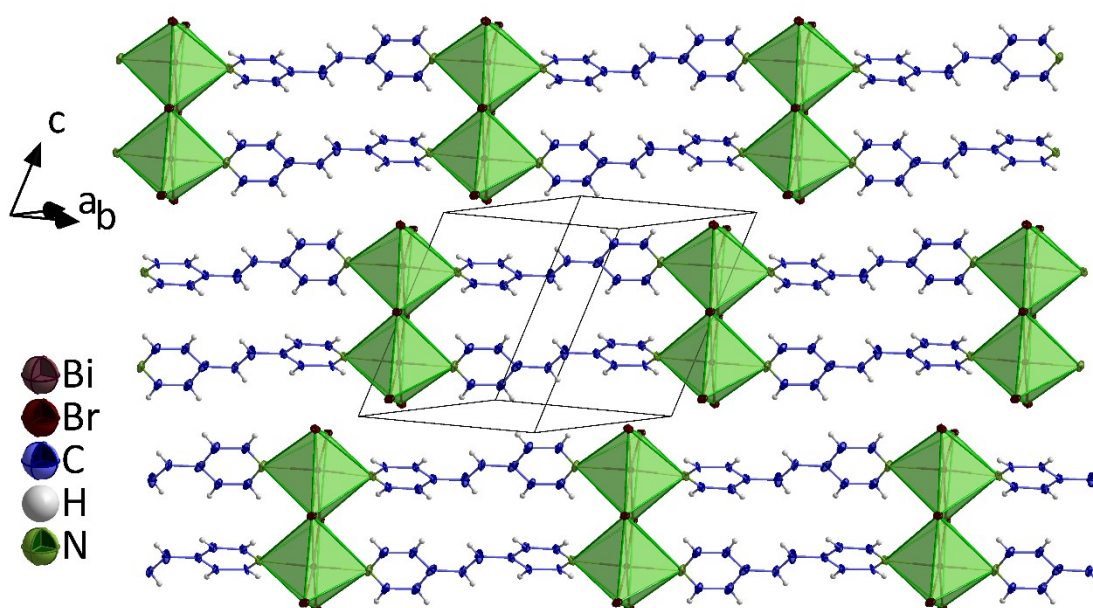

**Figure S11.** Depiction of the Bi coordination (top) and excerpt of the crystal structure displaying the linear double-strands in  $1_{\infty}[\text{Bi}_2\text{Br}_6(\text{bpe})_2]$  (**4b**). Symmetry operations: I:  $2-x, 2-y, 1-z$ , II:  $1+x, 1+y, +z$ .



**Table S17:** Selected interatomic distances (in Å) and angles (in °) in **4c**.

Symmetry operations: I: -x, 1-y, 1-z; II: -1+x, -1+y, +z

|                      |           |                        |             |                                      |           |
|----------------------|-----------|------------------------|-------------|--------------------------------------|-----------|
| Bi1 I3               | 3.2101(5) | I2 Bi1 I3              | 174.15(2)   | N1 Bi1 I2                            | 91.19(11) |
| Bi1 I2               | 2.9173(5) | I1 Bi1 I3              | 88.470(12)  | N1 Bi1 I3 <sup>I</sup>               | 87.08(11) |
| Bi1 I1               | 2.8846(4) | I1 Bi1 I2              | 96.133(13)  | N2 <sup>II</sup> Bi1 I3              | 89.30(11) |
| Bi1 I3 <sup>I</sup>  | 3.3036(4) | I1 Bi1 I3 <sup>I</sup> | 176.001(13) | N2 <sup>II</sup> Bi1 I2              | 94.25(11) |
| Bi1 N1               | 2.513(5)  | I1 Bi1 N1              | 91.06(11)   | N2 <sup>II</sup> Bi1 I1              | 90.63(11) |
| Bi1 N2 <sup>II</sup> | 2.588(5)  | I3 <sup>I</sup> Bi1 I3 | 87.846(12)  | N2 <sup>II</sup> Bi1 I3 <sup>I</sup> | 90.88(11) |
|                      |           | I3 <sup>I</sup> Bi1 I2 | 87.449(13)  | N2 <sup>II</sup> Bi1 N1              | 174.1(2)  |
|                      |           | N1 Bi1 I3              | 85.10(11)   |                                      |           |

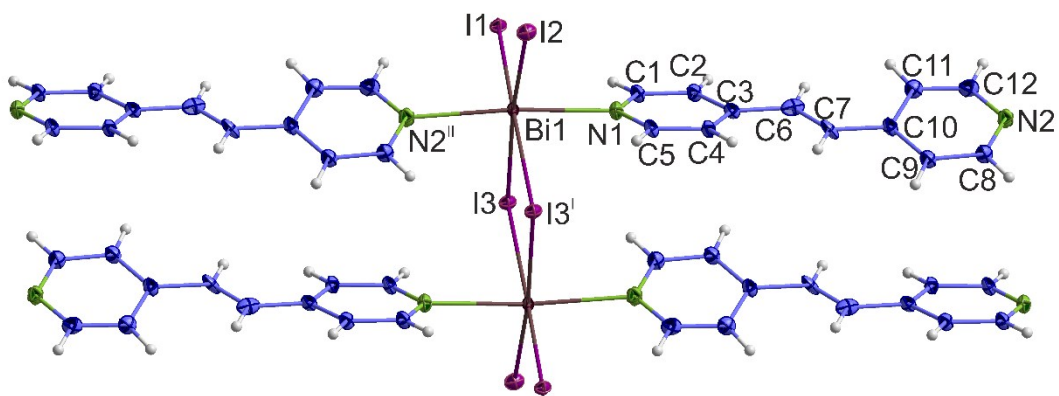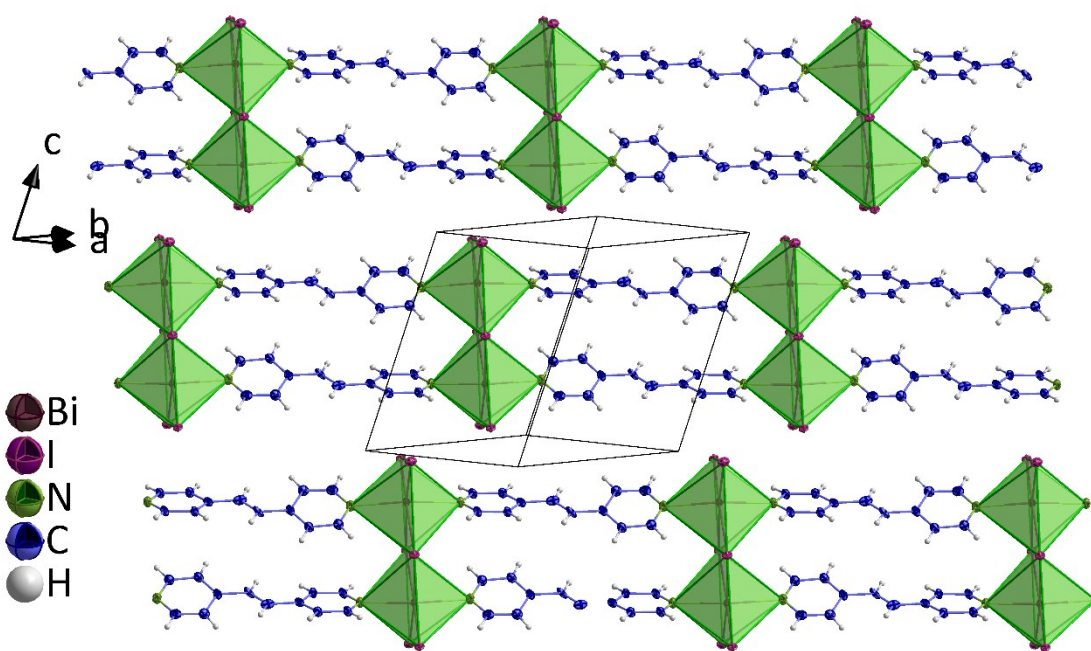

**Figure S12.** Depiction of the Bi coordination (top) and excerpt of the crystal structure displaying the linear double-strands in  $1_{\infty}[\text{Bi}_2\text{I}_6(\text{bpe})_2]$  (**4c**). Symmetry operations: I:  $-x, 1-y, 1-z$ ; II:  $-1+x, -1+y, +z$ .

## Crystallographic details for 5a-c

Table S18 Crystallographic data for 5a-c.

|                                                                           | 5a                                                               | 5b                                                               | 5c                                                              |
|---------------------------------------------------------------------------|------------------------------------------------------------------|------------------------------------------------------------------|-----------------------------------------------------------------|
| Empirical formula                                                         | C <sub>12</sub> H <sub>12</sub> BiCl <sub>3</sub> N <sub>2</sub> | C <sub>12</sub> H <sub>12</sub> BiBr <sub>3</sub> N <sub>2</sub> | C <sub>12</sub> H <sub>12</sub> BiI <sub>3</sub> N <sub>2</sub> |
| Formula weight /g·mol <sup>-1</sup>                                       | 499.57                                                           | 632.95                                                           | 773.92                                                          |
| Crystal color and shape                                                   | colourless block                                                 | colourless block                                                 | yellow needle                                                   |
| Crystal size                                                              | 0.236 × 0.142 × 0.106                                            | 0.105 × 0.064 × 0.037                                            | 0.136 × 0.121 × 0.063                                           |
| Crystal system                                                            | triclinic                                                        | triclinic                                                        | triclinic                                                       |
| Space group                                                               | <i>P</i> 2 <sub>1</sub> 2 <sub>1</sub>                           | <i>P</i> 2 <sub>1</sub> 2 <sub>1</sub>                           | <i>P</i> 2 <sub>1</sub> 2 <sub>1</sub>                          |
| <i>a</i> /pm                                                              | 884.01(7)                                                        | 894.83(4)                                                        | 921.74(7)                                                       |
| <i>b</i> /pm                                                              | 913.62(7)                                                        | 945.11(4)                                                        | 986.40(8)                                                       |
| <i>c</i> /pm                                                              | 1050.82(9)                                                       | 1052.23(6)                                                       | 1106.19(8)                                                      |
| $\alpha$ /°                                                               | 68.695(4)                                                        | 69.645(3)                                                        | 66.722(2)                                                       |
| $\beta$ /°                                                                | 71.645(4)                                                        | 70.592(3)                                                        | 73.097(2)                                                       |
| $\gamma$ /°                                                               | 75.065(3)                                                        | 78.476(2)                                                        | 84.010(2)                                                       |
| <i>V</i> /10 <sup>6</sup> · pm <sup>3</sup>                               | 740.55(11)                                                       | 783.33(7)                                                        | 883.91(12)                                                      |
| <i>Z</i>                                                                  | 2                                                                | 2                                                                | 2                                                               |
| $\rho_{\text{calc}}$ /g·cm <sup>-3</sup>                                  | 2.240                                                            | 2.683                                                            | 2.908                                                           |
| <i>F</i> (000)                                                            | 464                                                              | 572.0                                                            | 680.0                                                           |
| $\mu$ (MoK $\alpha$ ) /cm <sup>-1</sup>                                   | 12.428                                                           | 18.915                                                           | 15.200                                                          |
| Temperature/K                                                             | 100                                                              | 100                                                              | 100                                                             |
| 2 $\theta$ range /°                                                       | 4.292- 54.444                                                    | 4.308- 54.412                                                    | 4.166 – 54.442                                                  |
| No. of measured reflections                                               | 28575                                                            | 28354                                                            | 30949                                                           |
| No. of independent reflections                                            | 3287                                                             | 3504                                                             | 3941                                                            |
| <i>R</i> (int)                                                            | 0.0577                                                           | 0.0861                                                           | 0.0744                                                          |
| No. of parameters                                                         | 163                                                              | 164                                                              | 164                                                             |
| <i>R</i> <sub>1</sub> ( <i>I</i> > 2 $\sigma$ ( <i>I</i> ))               | 0.0307                                                           | 0.0361                                                           | 0.0256                                                          |
| <i>R</i> <sub>1</sub> (all data)                                          | 0.0381                                                           | 0.0478                                                           | 0.0295                                                          |
| <i>wR</i> <sub>2</sub> (all data)                                         | 0.0749                                                           | 0.0872                                                           | 0.0586                                                          |
| <i>S</i> (all data)                                                       | 1.090                                                            | 1.024                                                            | 1.032                                                           |
| $\Delta\rho_{\text{max}}$ , $\Delta\rho_{\text{min}}$ /e· Å <sup>-3</sup> | 2.400 / -2.727                                                   | 2.948 / -1.896                                                   | 1.212 / -1.284                                                  |

Table S19: Selected interatomic distances (in Å) and angles (in °) in 5a.

Symmetry operations: I: 1-x, 2-y, 1-z; II: 1+x, 1+y, +z

|                      |            |                          |           |                                       |           |
|----------------------|------------|--------------------------|-----------|---------------------------------------|-----------|
| Bi1 Cl3              | 2.8918(17) | Cl2 Bi1 Cl3              | 88.09(5)  | N1 Bi1 Cl2                            | 88.35(17) |
| Bi1 Cl2              | 2.5206(17) | Cl1 Bi1 Cl3              | 176.98(5) | N1 Bi1 Cl3 <sup>I</sup>               | 90.93(17) |
| Bi1 Cl1              | 2.5421(16) | Cl1 Bi1 Cl2              | 94.17(6)  | N2 <sup>II</sup> Bi1 Cl3              | 90.83(14) |
| Bi1 Cl3 <sup>I</sup> | 2.9278(18) | Cl1 Bi1 Cl3 <sup>I</sup> | 92.59(5)  | N2 <sup>II</sup> Bi1 Cl2              | 88.52(15) |
| Bi1 N1               | 2.499(5)   | Cl1 Bi1 N1               | 89.65(14) | N2 <sup>II</sup> Bi1 Cl1              | 87.23(14) |
| Bi1 N2 <sup>II</sup> | 2.512(5)   | Cl3 <sup>I</sup> Bi1 Cl3 | 85.19(5)  | N2 <sup>II</sup> Bi1 Cl3 <sup>I</sup> | 92.58(15) |
|                      |            | Cl3 <sup>I</sup> Bi1 Cl2 | 173.20(5) | N2 <sup>II</sup> Bi1 N1               | 175.4(2)  |
|                      |            | N1 Bi1 Cl3               | 92.41(14) |                                       |           |

**Table S20:** Selected interatomic distances (in Å) and angles (in °) in **5b**.

Symmetry operations: I : 1-x, 2-y, 1-z; II: 1+x, 1+y, +z

|                      |           |                          |           |                                       |           |
|----------------------|-----------|--------------------------|-----------|---------------------------------------|-----------|
| Bi1 Br3              | 3.0540(9) | Br2 Bi1 Br3              | 177.20(3) | N1 Bi1 Br2                            | 90.97(16) |
| Bi1 Br2              | 2.6914(9) | Br1 Bi1 Br3              | 86.58(3)  | N1 Bi1 Br3 <sup>I</sup>               | 90.02(17) |
| Bi1 Br1              | 2.6689(9) | Br1 Bi1 Br2              | 94.90(3)  | N2 <sup>II</sup> Bi1 Br3              | 89.41(16) |
| Bi1 Br3 <sup>I</sup> | 3.0585(9) | Br1 Bi1 Br3 <sup>I</sup> | 173.60(3) | N2 <sup>II</sup> Bi1 Br2              | 88.19(16) |
| Bi1 N1               | 2.489(6)  | Br1 Bi1 N1               | 88.24(17) | N2 <sup>II</sup> Bi1 Br1              | 90.94(17) |
| Bi1 N2 <sup>II</sup> | 2.529(6)  | Br3 <sup>I</sup> Bi1 Br3 | 87.31(2)  | N2 <sup>II</sup> Bi1 Br3 <sup>I</sup> | 90.90(17) |
|                      |           | Br3 <sup>I</sup> Bi1 Br2 | 91.29(3)  | N2 <sup>II</sup> Bi1 N1               | 178.8(2)  |
|                      |           | N1 Bi1 Br3               | 91.45(16) |                                       |           |

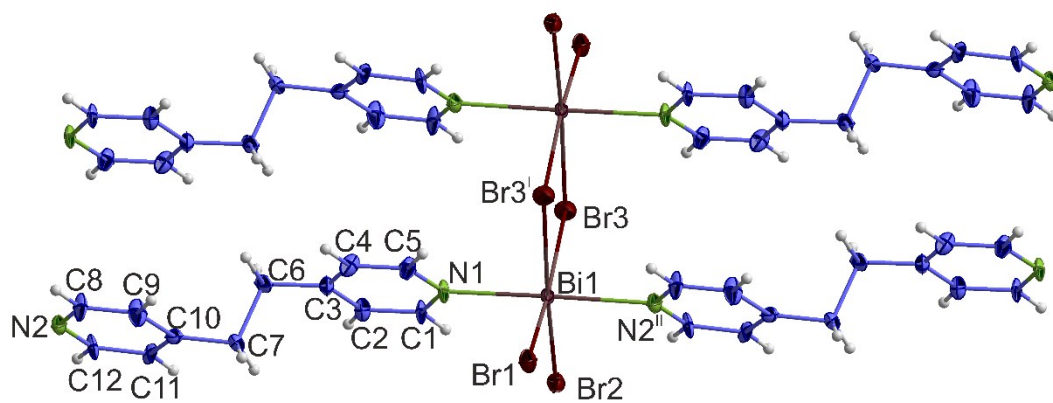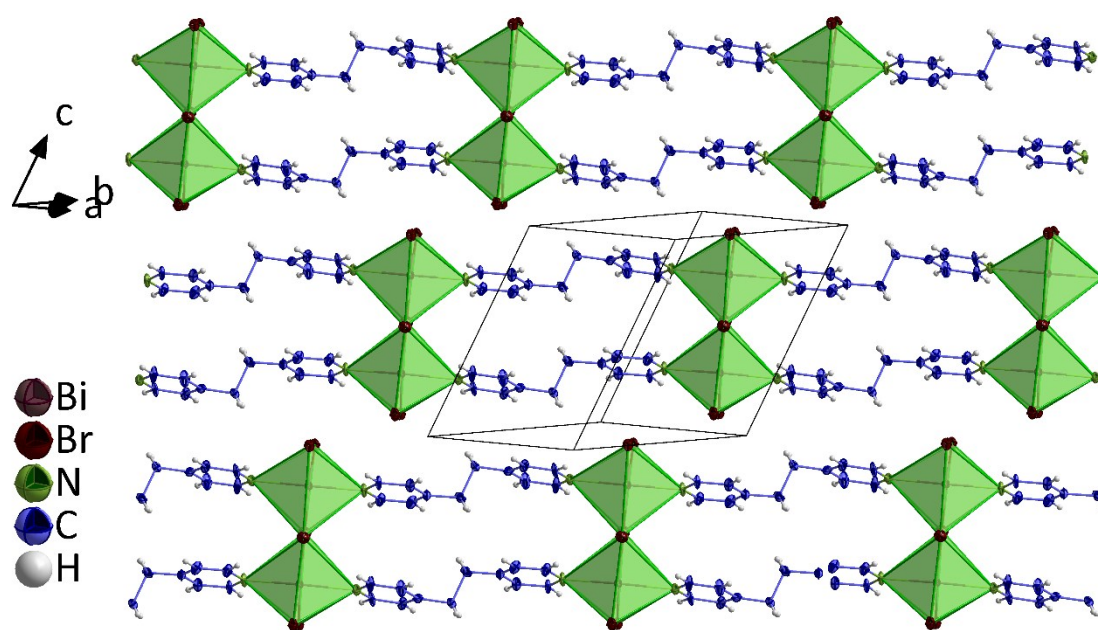

**Figure S13.** Depiction of the Bi coordination (top) and excerpt of the crystal structure displaying the linear double-strands in  ${}^1\infty[\text{Bi}_2\text{Br}_6(\text{bpa})_2]$  (**5b**). Symmetry operations: I:  $1-x, 2-y, 1-z$ ; II:  $1+x, 1+y, +z$ .

**Table S21:** Selected interatomic distances (in Å) and angles (in °) in **5c**.

Symmetry operations: I: 1-x, 2-y, 1-z; II: 1+x, 1+y, +z

|                      |           |                        |             |                                      |            |
|----------------------|-----------|------------------------|-------------|--------------------------------------|------------|
| Bi1 I3               | 3.2594(4) | I2 Bi1 I3              | 177.061(13) | N1 Bi1 I2                            | 88.36(11)  |
| Bi1 I2               | 2.8858(5) | I1 Bi1 I3              | 86.962(13)  | N1 Bi1 I3 <sup>I</sup>               | 91.46(11)  |
| Bi1 I1               | 2.8758(5) | I1 Bi1 I2              | 94.715(15)  | N2 <sup>II</sup> Bi1 I3              | 90.94(11)  |
| Bi1 I3 <sup>I</sup>  | 3.2557(5) | I1 Bi1 I3 <sup>I</sup> | 176.244(13) | N2 <sup>II</sup> Bi1 I2              | 91.48(11)  |
| Bi1 N1               | 2.548(4)  | I1 Bi1 N1              | 89.41(11)   | N2 <sup>II</sup> Bi1 I1              | 89.76(11)  |
| Bi1 N2 <sup>II</sup> | 2.520(4)  | I3 <sup>I</sup> Bi1 I3 | 89.395(12)  | N2 <sup>II</sup> Bi1 I3 <sup>I</sup> | 89.38(11)  |
|                      |           | I3 <sup>I</sup> Bi1 I2 | 88.963(14)  | N2 <sup>II</sup> Bi1 N1              | 179.14(15) |
|                      |           | N1 Bi1 I3              | 89.24(11)   |                                      |            |

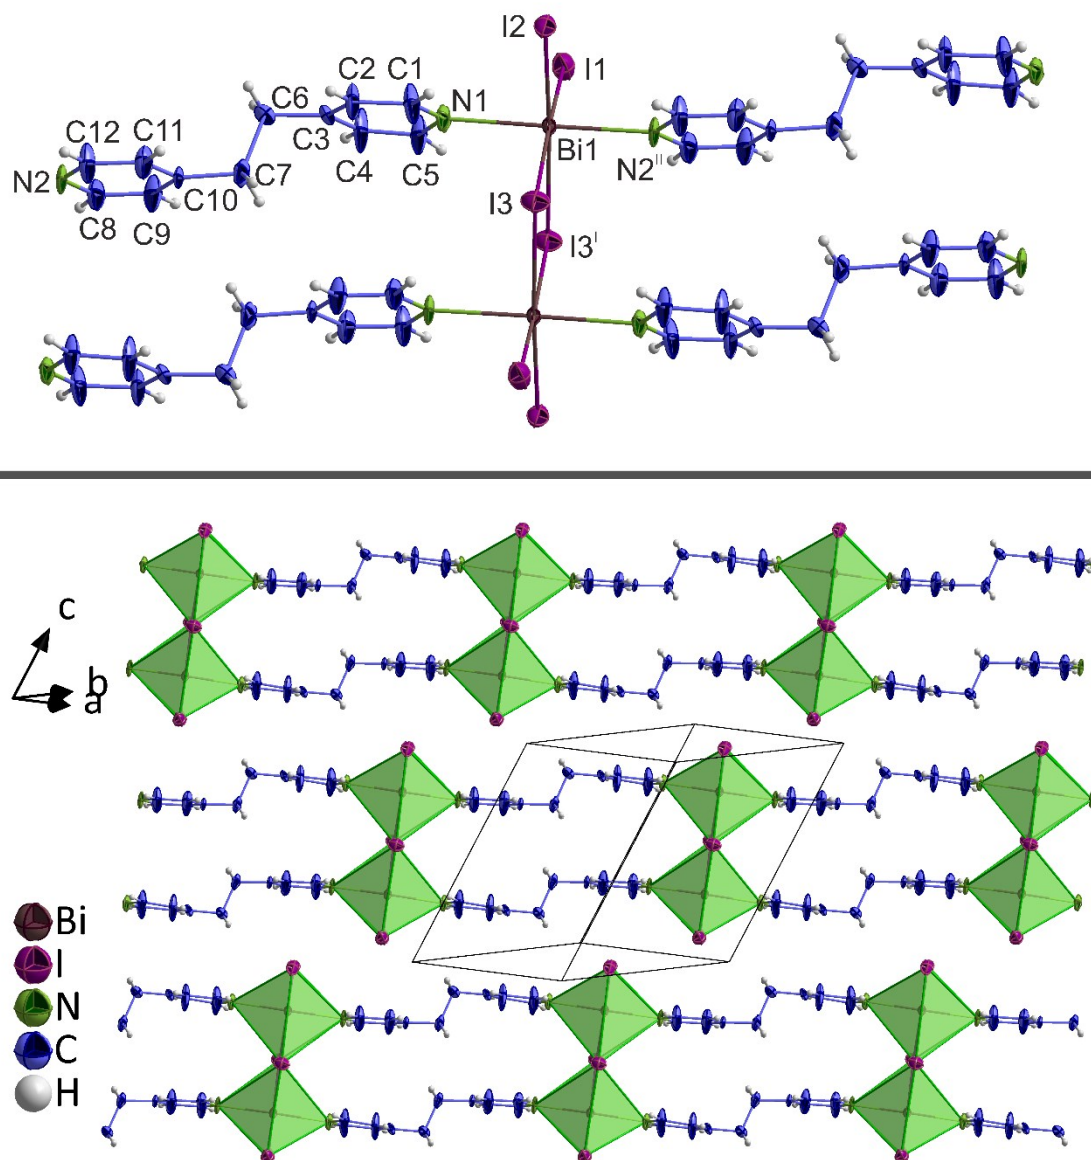

**Figure S14.** Depiction of the Bi coordination (top) and excerpt of the crystal structure displaying the linear double-strands in  $1-[\text{Bi}_2\text{I}_6(\text{bpa})_2]$  (**5c**). Symmetry operations: I :  $1-x, 2-y, 1-z$ ; II:  $1+x, 1+y, +z$ .

**Table S22:** Comparison of interatomic distances of compounds **1-5** with literature known reference compounds.

| Compound | M-X interatomic distance [pm] | M-N interatomic distance [pm] | Reference compound                                                                                                            | M-X interatomic distance [pm] | M-N interatomic distance [pm] |
|----------|-------------------------------|-------------------------------|-------------------------------------------------------------------------------------------------------------------------------|-------------------------------|-------------------------------|
| 1a       | 253-291                       | 251-253                       | <sup>1</sup> <sub>∞</sub> [Bi <sub>2</sub> Cl <sub>6</sub> (bipy) <sub>2</sub> ] <sup>1</sup>                                 | 251-291                       | 252-254                       |
| 2a       | 252-293                       | 250-251                       | <sup>2</sup> <sub>∞</sub> [Bi <sub>2</sub> Cl <sub>6</sub> (pyz) <sub>4</sub> ] <sup>2</sup>                                  | 256-305                       | 249-275                       |
| 3a       | 241-301                       | 235-250                       | [(CH <sub>3</sub> ) <sub>3</sub> NH] <sub>3</sub> [Sb <sub>2</sub> Cl <sub>9</sub> ] <sup>3</sup>                             | 240-319                       | /                             |
| 4a       | 240-313                       | 233-250                       | [Sb(2AcPNO <sub>2</sub> Ph)(DMSO)Cl <sub>2</sub> ] <sup>4</sup>                                                               | 254-265                       | 226-255                       |
| 4a'      | 241-300                       | 235-252                       |                                                                                                                               |                               |                               |
| 5a       | 237-274                       | 231-254                       |                                                                                                                               |                               |                               |
| 1b       | 267-305                       | 251-254                       | <sup>1</sup> <sub>∞</sub> [Bi <sub>2</sub> Br <sub>6</sub> (bipy) <sub>2</sub> ] <sup>1</sup>                                 | 264-308                       | 245-259                       |
| 2b       | 267-305                       | 248-256                       | Bi <sub>2</sub> Br <sub>6</sub> (2-bipy) <sub>2</sub> <sup>5</sup>                                                            | 268-303                       | 242-251                       |
| 3b       | 257-316                       | 238-253                       | [(CH <sub>3</sub> ) <sub>4</sub> N] <sub>3</sub> [Sb <sub>2</sub> Br <sub>9</sub> ] <sub>x</sub> Br <sub>2</sub> <sup>6</sup> | 263-304                       | /                             |
| 4b       | 258-314                       | 240-247                       | [Sb(2AcPNO <sub>2</sub> Ph)(DMSO)Cl <sub>2</sub> ] <sup>4</sup>                                                               | 254-265                       | 226-255                       |
| 5b       | 253-334                       | 233-256                       |                                                                                                                               |                               |                               |
| 1c       | 288-330                       | 251-258                       |                                                                                                                               |                               |                               |
| 2c       | 287-326                       | 251-254                       | Bi <sub>2</sub> I <sub>6</sub> (3-methylpyridine) <sub>4</sub> <sup>7</sup>                                                   | 292-324                       | 252-258                       |
| 3c       | 278-341                       | 239-252                       | <i>cis</i> -(Me <sub>4</sub> Sb) <sub>2</sub> [Ph <sub>2</sub> Sb <sub>2</sub> I <sub>6</sub> ] <sup>8</sup>                  | 286-332                       | /                             |
| 4c       | 280-328                       | 242-248                       | [Sb(2AcPNO <sub>2</sub> Ph)(DMSO)Cl <sub>2</sub> ] <sup>4</sup>                                                               | 254-265                       | 226-255                       |
| 5c       | 278-345                       | 241-253                       |                                                                                                                               |                               |                               |

## References

- 1 J. R. Sorg, T. Wehner, P. R. Matthes, R. Sure, S. Grimme, J. Heine and K. Müller-Buschbaum, *Dalton Trans.*, 2018.
- 2 J. Heine, T. Wehner, R. Bertermann, A. Steffen and K. Müller-Buschbaum, *Inorg. Chem.*, 2014, **53**, 7197–7203.
- 3 M. Bujak and J. Zaleski, *J. Solid State Chem.*, 2004, **177**, 3202–3211.
- 4 E. D.L. Piló, A. A. Recio-Despaigne, J. G. Da Silva, I. P. Ferreira, J. A. Takahashi and H. Beraldo, *Polyhedron*, 2015, **97**, 30–38.
- 5 G. A. Bowmaker, F. M. M. Hannaway, P. C. Junk, A. M. Lee, B. W. Skelton and A. H. White, *Aust. J. Chem.*, 1998, **51**, 331.
- 6 C. R. Hubbard and R. A. Jacobson, *Inorg. Chem.*, 1972, **11**, 2247–2250.
- 7 A. Lennartson, M. Hakansson CCDC 840295: Experimental Crystal Structure Determination, 2011, DOI: 10.5517/ccx6d9s.
- 8 H. J. Breunig, M. Denker, E. Lork, *Z. anorg. allg. Chem.*, 1999, 625, 117-120.



## Powder X-Ray Diffraction

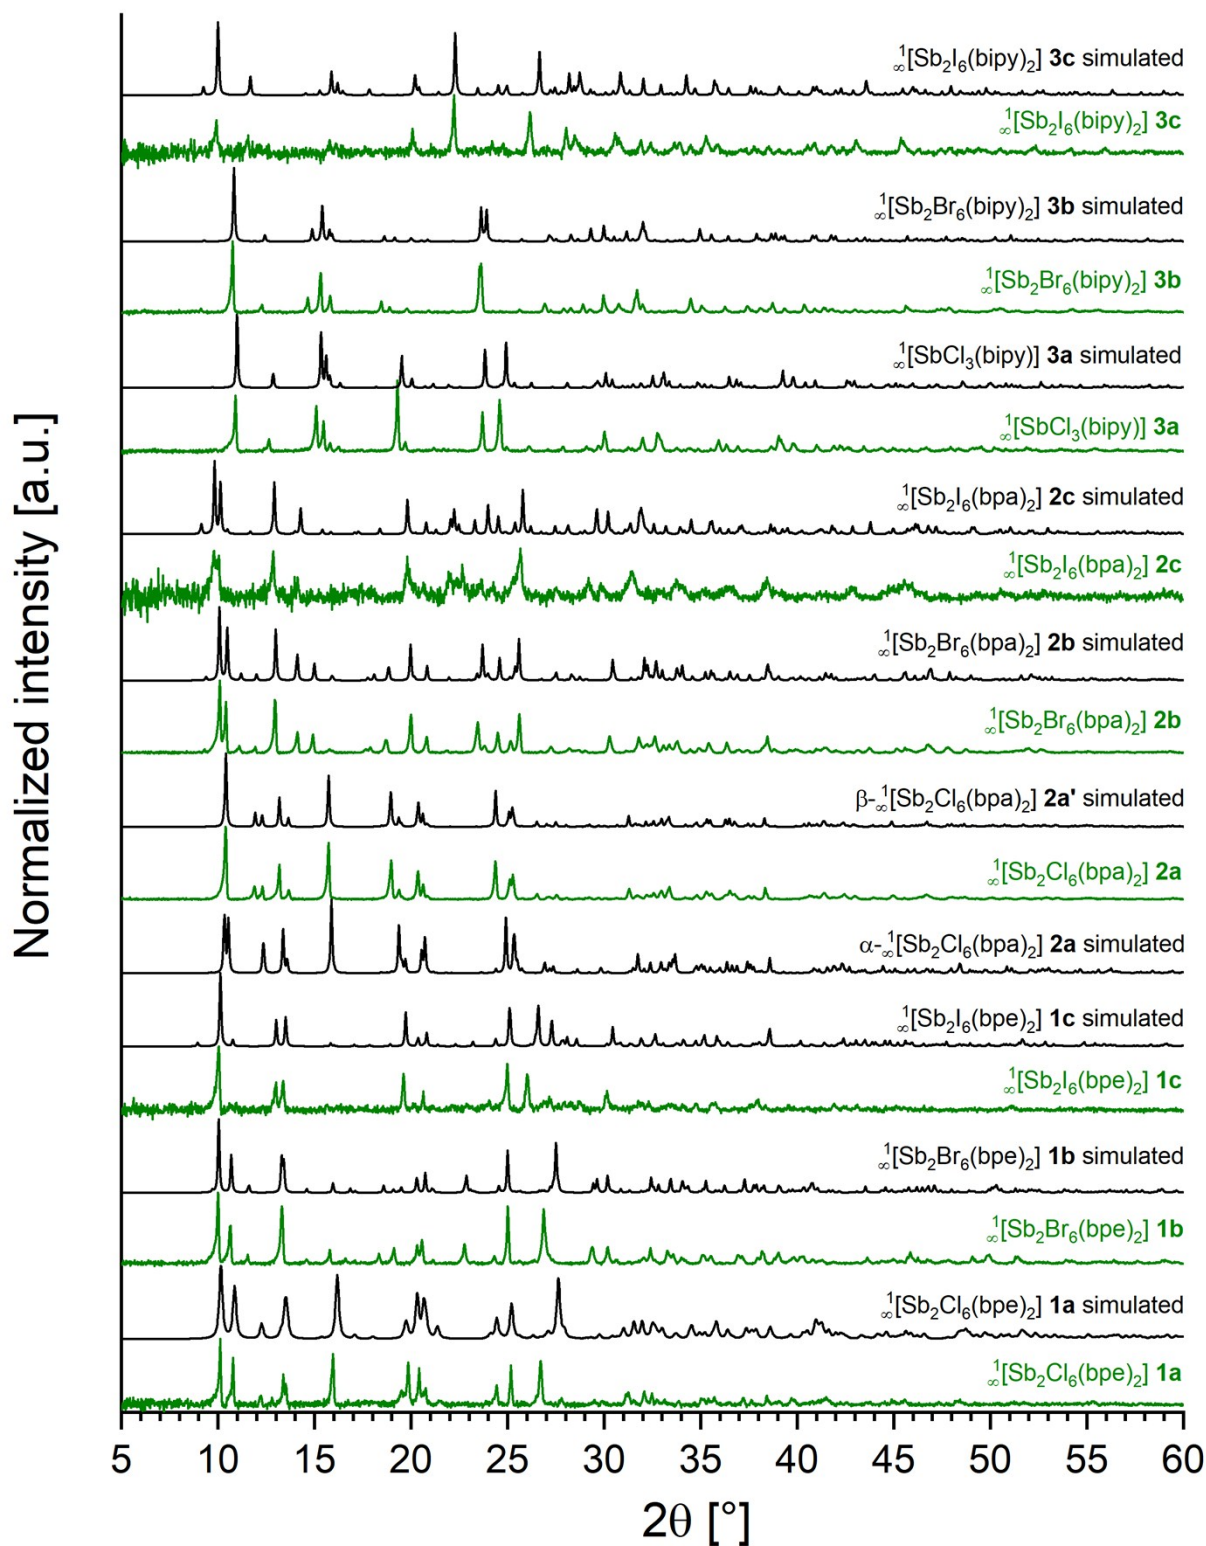

**Figure S15.** Comparison of obtained diffractograms (blue) and simulated diffractograms from single-crystal data (black) for compounds 1-3.

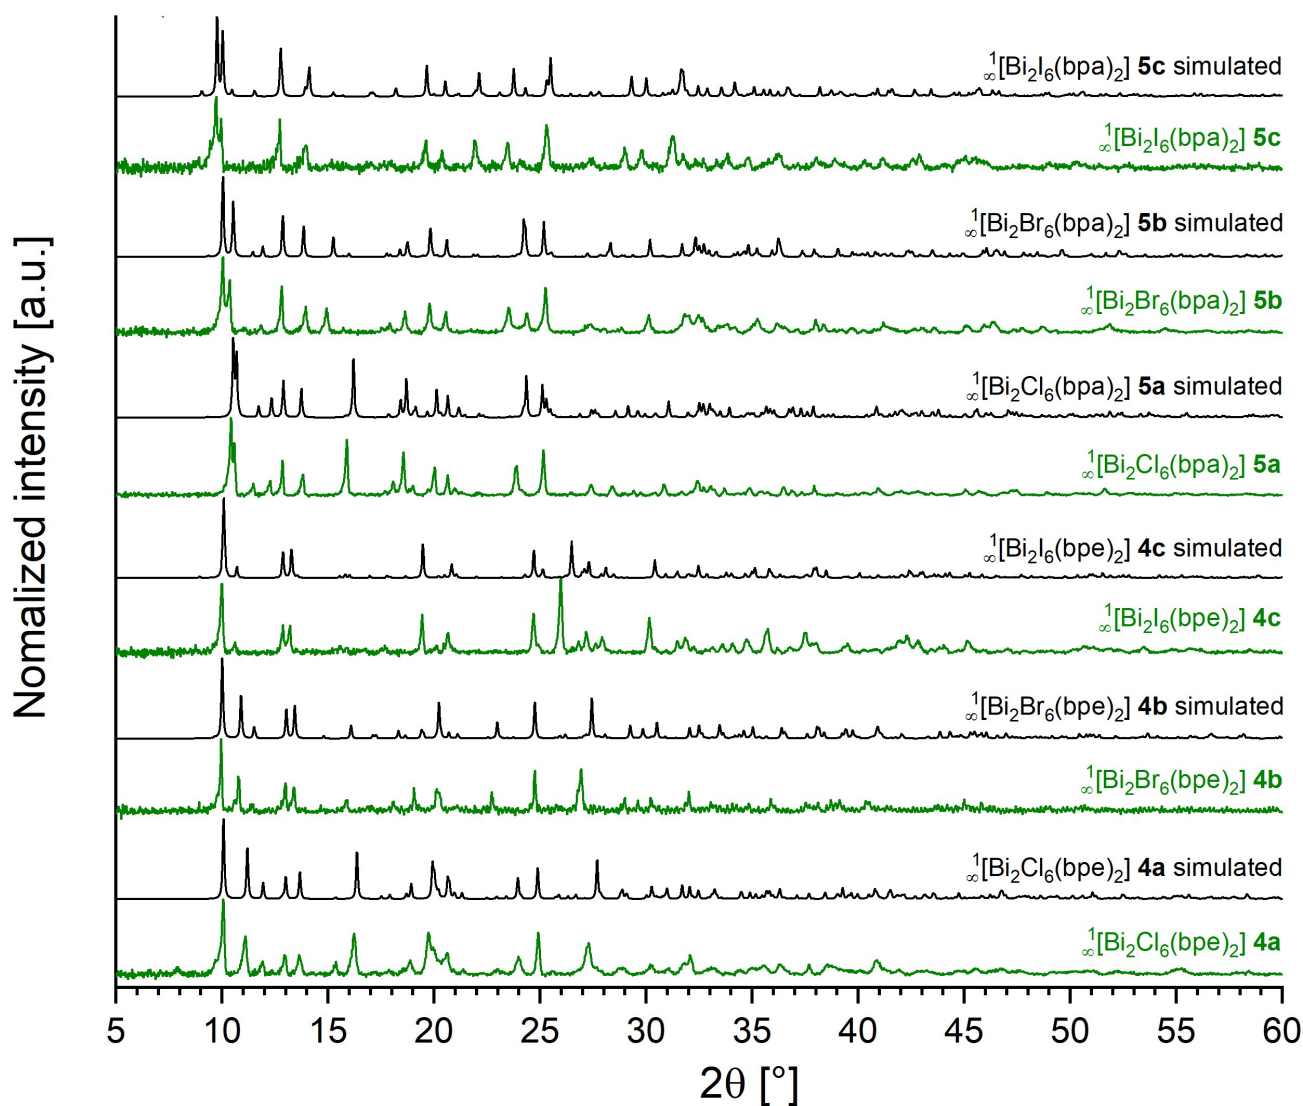

**Figure S16.** Comparison of obtained diffractograms (blue) and simulated diffractograms from single-crystal data (black) for compounds **4-5**.

Small differences in reflection positions and intensities between obtained and simulated diffractograms arise due to small differences in the crystal structures depending on the temperature. This effect was investigated in detail for compound **2a**. While the simulation of **2a** (100K) shows the mentioned differences (cf. figure S15), the simulation of **2a'** (300K) is perfectly matching the obtained diffractogram. As all other single crystal analyses were carried out at reduced temperatures (100K or 200K), the simulated diffractograms show similar small differences in comparison with the experimental diffractograms that were obtained at room-temperature.

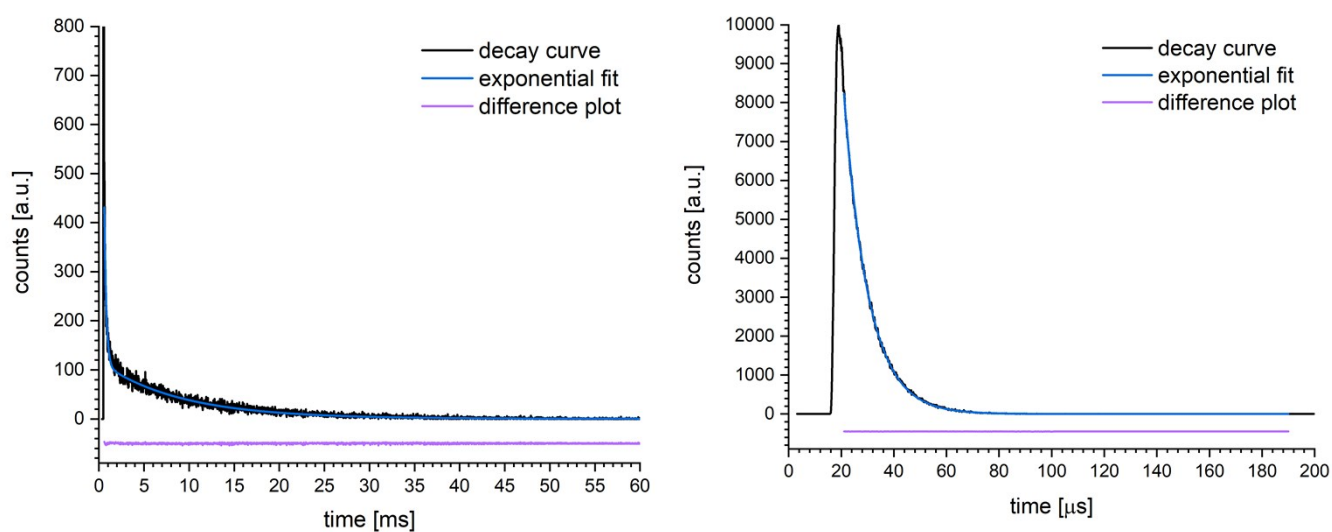

**Figure S17.** Decay curves (black), exponential fit curves (blue) and difference plot (violet) of emission at 674 nm of  $\infty$ [Sb<sub>2</sub>Cl<sub>6</sub>(bpe)<sub>2</sub>] (**1a**, left) and emission at 684 nm of  $\infty$ [Sb<sub>2</sub>Cl<sub>6</sub>(bpa)<sub>2</sub>] (**2a**, right).

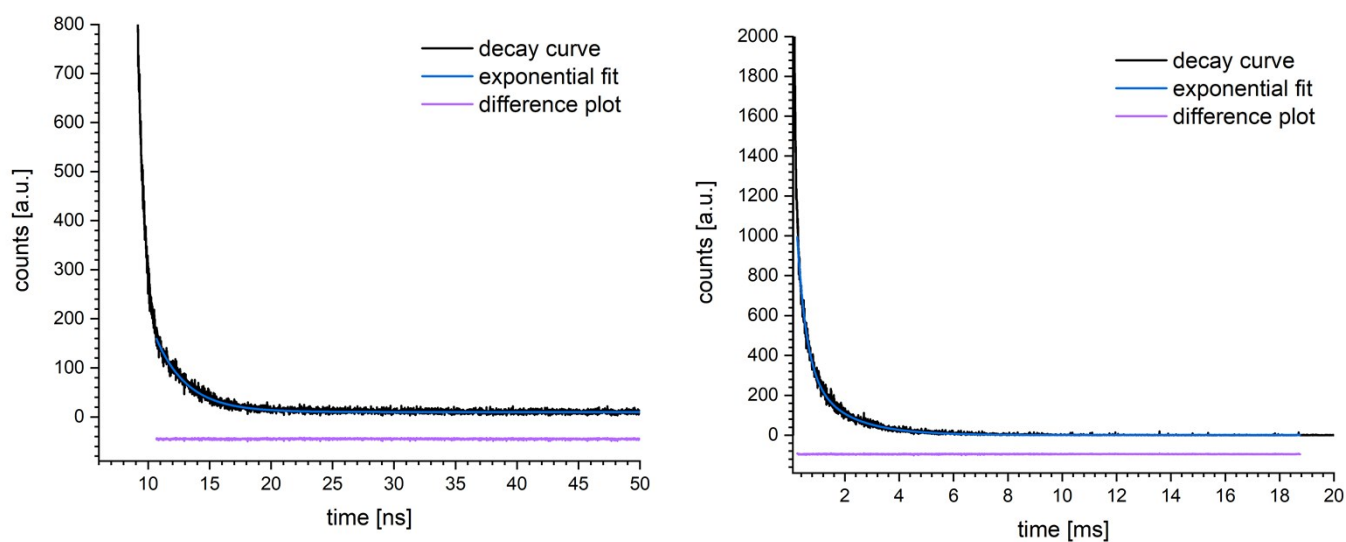

**Figure S18.** Decay curves (black), exponential fit curves (blue) and difference plot (violet) of emission at 443 nm (left) and at 572 nm (right) of  $\infty$ [Bi<sub>2</sub>Cl<sub>6</sub>(bpe)<sub>2</sub>] (**4a**).

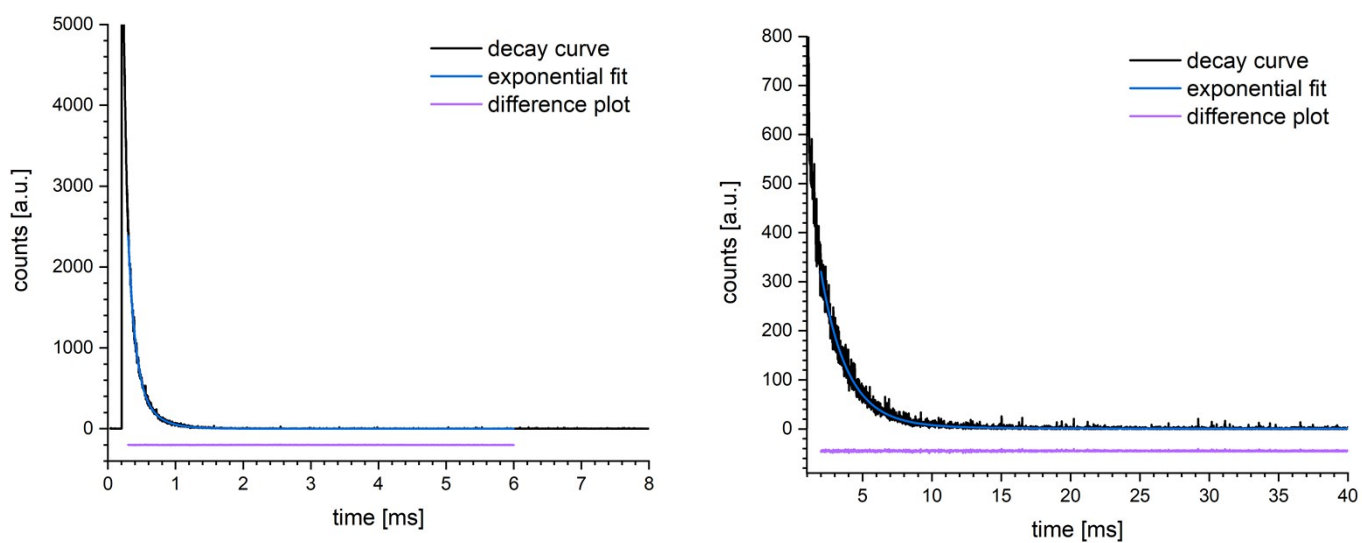

**Figure S19.** Decay curves (black), exponential fit curves (blue) and difference plot (violet) of emission at 430 nm (left) and at 565 nm (right) of  $\infty$ [Bi<sub>2</sub>Cl<sub>6</sub>(bpa)<sub>2</sub>] (**5a**).

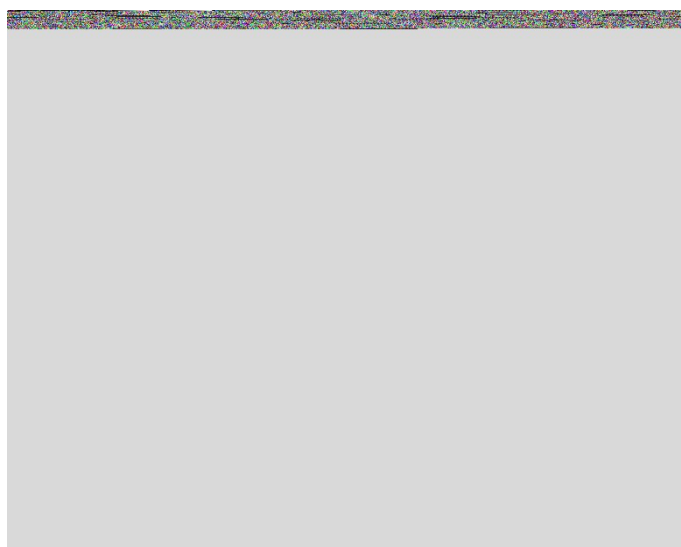

**Figure S20.** Decay curve (black), exponential fit curve (blue) and difference plot (violet) of emission at 502 nm of  $\infty$ [SbCl<sub>3</sub>(bipy)] (**3a**).

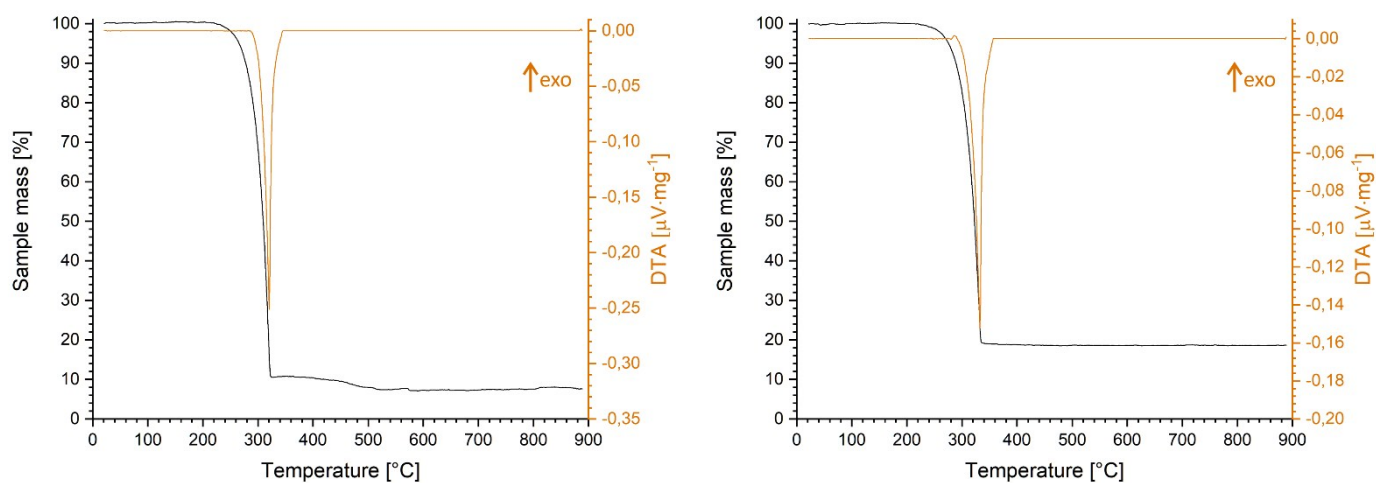

**Figure S21.** DTA- (black) and TG-curve of  $\infty$ [Sb<sub>2</sub>Cl<sub>6</sub>(bpe)<sub>2</sub>] (**1a**, left) and of  $\infty$ [Sb<sub>2</sub>Br<sub>6</sub>(bpe)<sub>2</sub>] (**1b**, right).

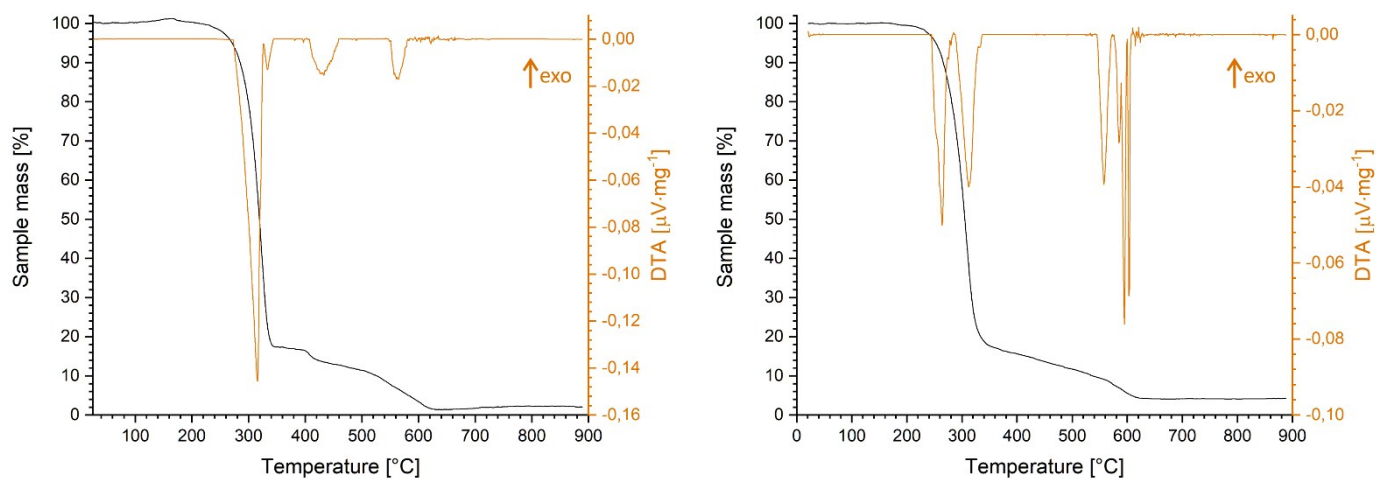

**Figure S22.** DTA- (black) and TG-curve of  $\infty$ [Sb<sub>2</sub>I<sub>6</sub>(bpe)<sub>2</sub>] (**1c**, left) and of  $\infty$ [Sb<sub>2</sub>Cl<sub>6</sub>(bpa)<sub>2</sub>] (**2a**, right).

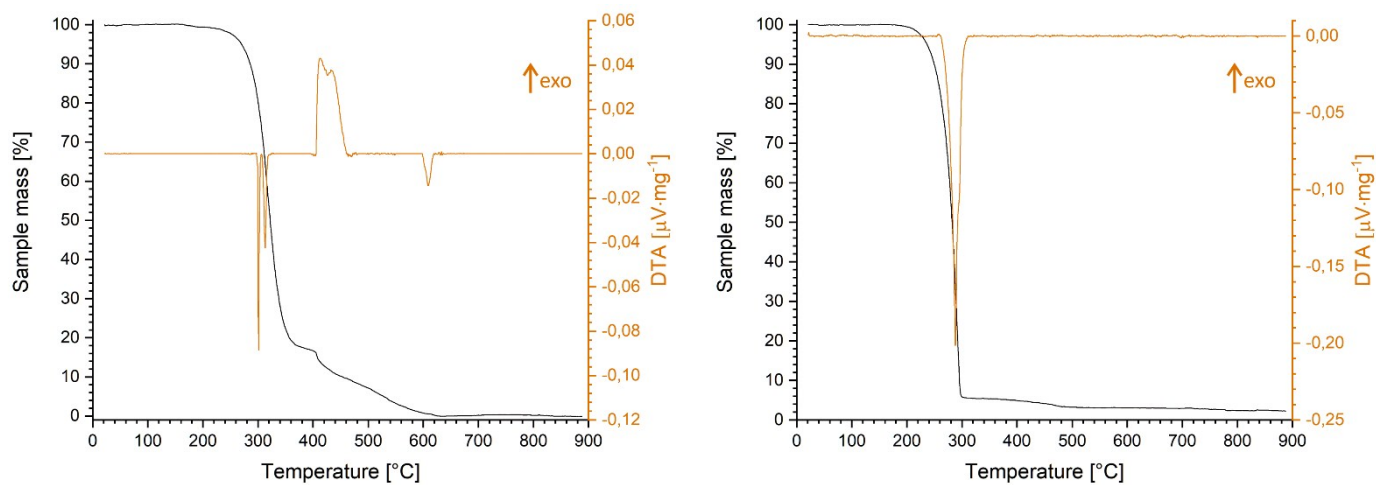

Figure S23. DTA- (black) and TG-curve of  $\infty[\text{Sb}_2\text{Br}_6(\text{bpa})_2]$  (**2b**, left) and of  $\infty[\text{SbCl}_3(\text{bipy})]$  (**3a**, right).

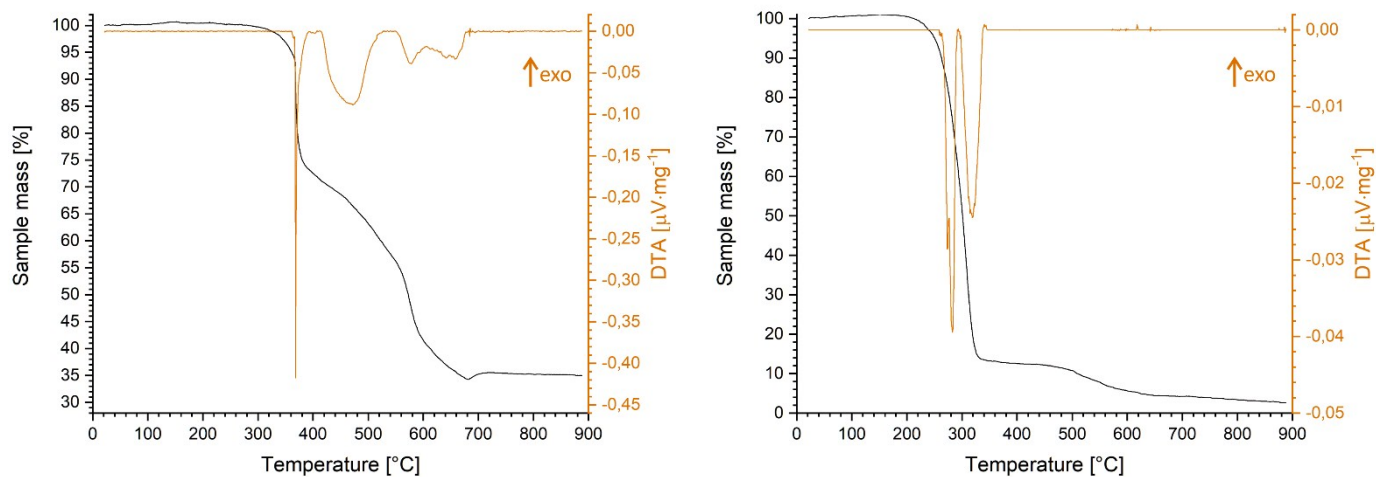

Figure S24. DTA- (black) and TG-curve of  $\infty[\text{Sb}_2\text{Br}_6(\text{bipy})_2]$  (**3b**, left) and of  $\infty[\text{Sb}_2\text{I}_6(\text{bipy})_2]$  (**3c**, right).

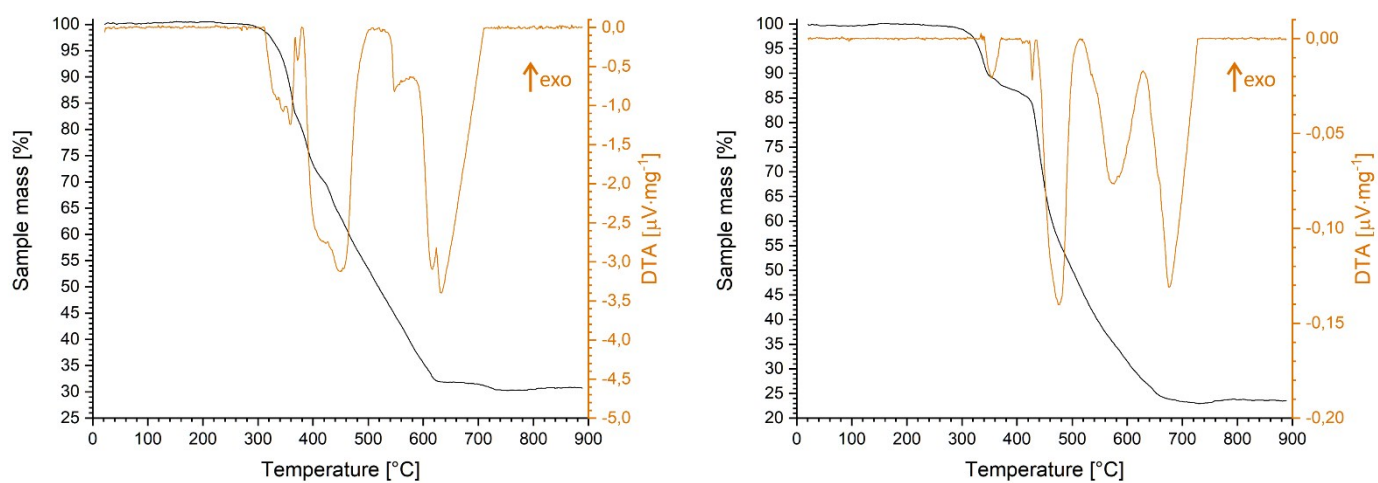

Figure S25. DTA- (black) and TG-curve of  $\infty[\text{Bi}_2\text{I}_6(\text{bpe})_2]$  (**4c**, left) and of  $\infty[\text{Bi}_2\text{I}_6(\text{bpa})_2]$  (**5c**, right).

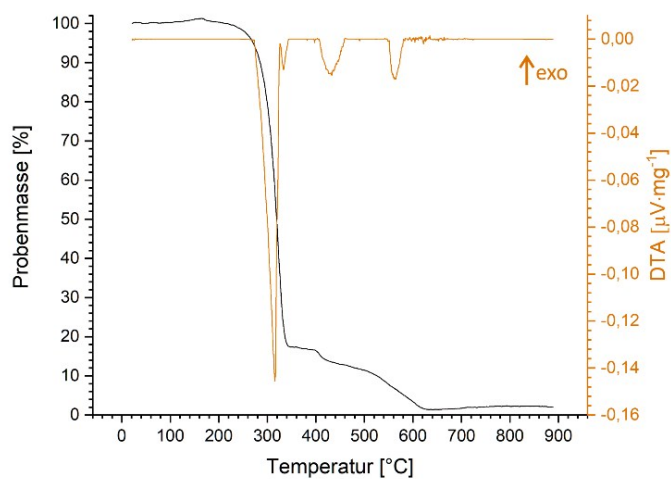

Figure S26. DTA- (black) and TG-curve of  $\infty[\text{Bi}_2\text{Cl}_6(\text{bpa})_2]$  (**5a**).

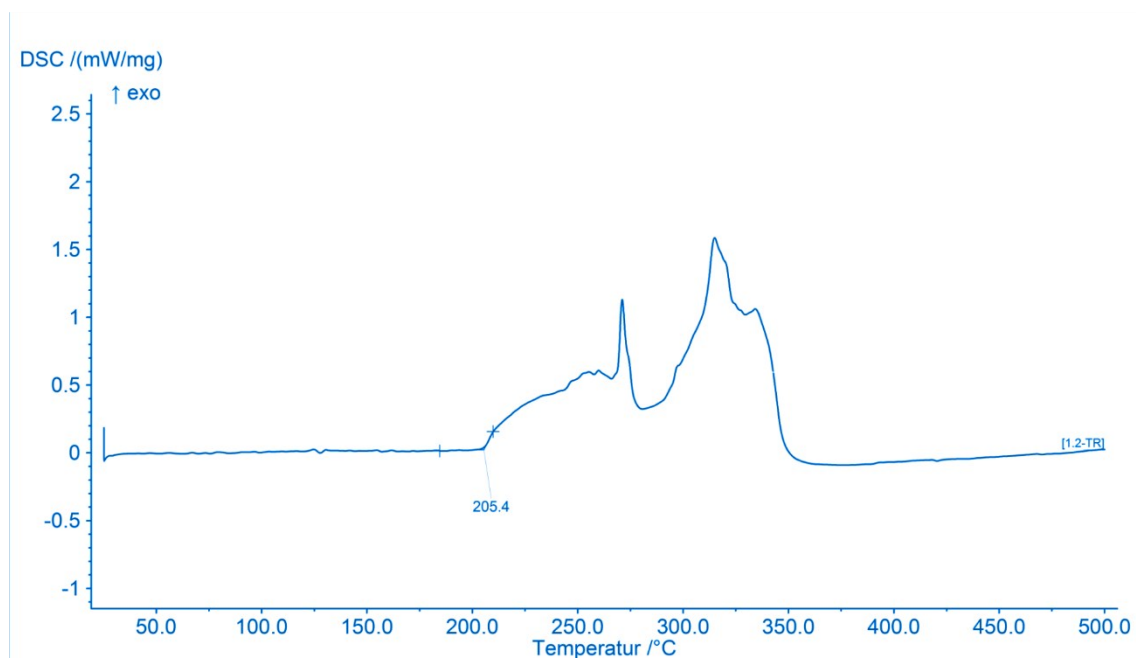

Figure S27. DSC-curve of  $[\text{Bi}_2\text{Cl}_6(\text{bpe})_2]$  (4a).

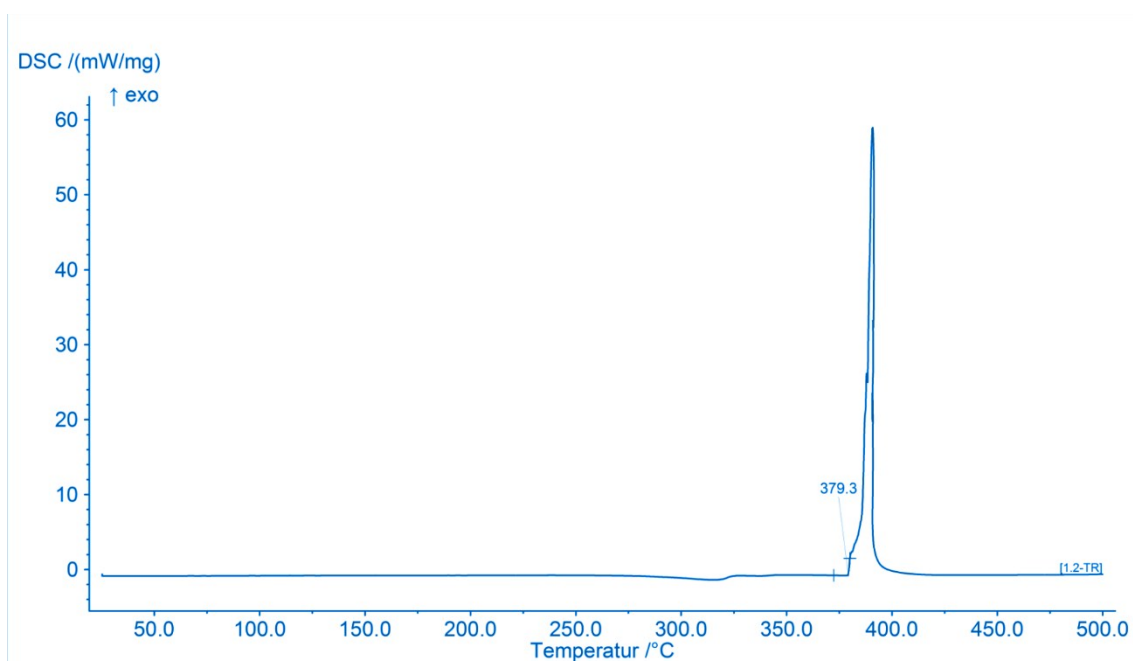

Figure S28. DSC-curve of  $[\text{Bi}_2\text{Br}_6(\text{bpe})_2]$  (4b).



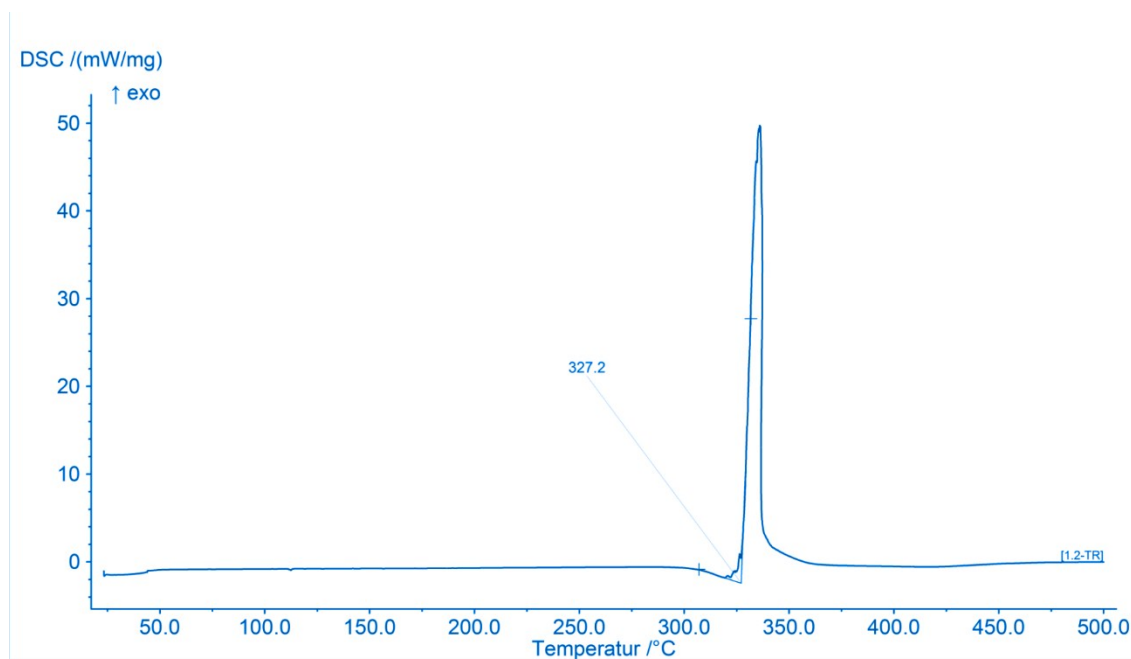

Figure S29. DSC-curve of  $\infty$ [Bi<sub>2</sub>Br<sub>6</sub>(bpa)<sub>2</sub>] (5b).

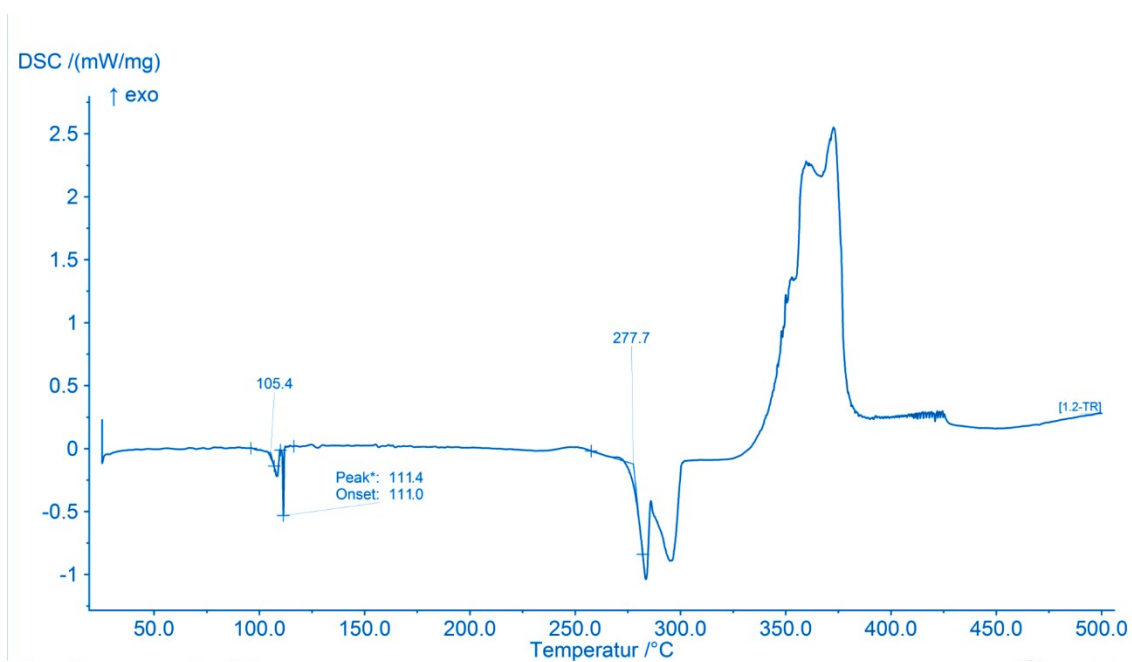

Figure S30. DSC-curve of  $\infty$ [Sb<sub>2</sub>I<sub>6</sub>(bpa)<sub>2</sub>] (2c).
